## **Pharmacologic rescue of circadian $\beta$ -cell failure through P2Y1 purinergic receptor identified by small-molecule screen**

### **Authors:**

Biliana Marcheva<sup>1§</sup>; Benjamin J. Weidemann<sup>1§</sup>; Akihiko Taguchi<sup>1,2§</sup>; Mark Perelis<sup>1,3</sup>; Kathryn Moynihan Ramsey<sup>1</sup>; Marsha V. Newman<sup>1</sup>; Yumiko Kobayashi<sup>1</sup>; Chiaki Omura<sup>1</sup>; Jocelyn E. Manning Fox<sup>4</sup>; Haopeng Lin<sup>4</sup>; Patrick E. MacDonald<sup>4</sup>; Joseph Bass<sup>1\*</sup>

### **Affiliations:**

<sup>1</sup>Department of Medicine, Division of Endocrinology, Metabolism and Molecular Medicine, Northwestern University Feinberg School of Medicine, Chicago, IL 60611, USA

<sup>2</sup>Division of Endocrinology, Metabolism, Hematological Science and Therapeutics, Department of Bio-Signal Analysis, Yamaguchi University, Graduate School of Medicine, 1-1-1, Minami Kogushi, Ube, Yamaguchi, 755-8505, Japan

<sup>3</sup>Ionis Pharmaceuticals, Inc., Carlsbad, CA 92010, USA

<sup>4</sup>Department of Pharmacology, Alberta Diabetes Institute, University of Alberta, Edmonton, AB, Canada

§Equally-contributing authors

### **\*Correspondence should be addressed to:**

Joseph Bass, M.D., Ph.D.

Department of Medicine, Feinberg School of Medicine

Division of Medicine, Metabolism and Molecular Biology

303 East Superior Street Lurie 7-107

Chicago, Illinois 60611

Phone: 312-503-2258

Fax: 312-503-5453

Email: [j-bass@northwestern.edu](mailto:j-bass@northwestern.edu)

## Summary:

The mammalian circadian clock drives daily oscillations in physiology and behavior through an autoregulatory transcription feedback loop present in central and peripheral cells. Ablation of the core clock within the endocrine pancreas of adult animals impairs the transcription and splicing of genes involved in hormone exocytosis and causes hypoinsulinemic diabetes. However, identification of druggable proteins and pathways to ameliorate the burden of circadian metabolic disease remains a challenge. Here, we generated  $\beta$  cells expressing a nano-luciferase reporter within the proinsulin polypeptide to screen 2,640 pharmacologically-active compounds and identify insulinotropic molecules that bypass the secretory defect in clock mutant  $\beta$  cells. We validated lead compounds in primary mouse islets and identified known modulators of ligand-gated ion channels and G-protein coupled receptors, including the antihelminthic ivermectin. Single-cell electrophysiology in circadian mutant mouse and human cadaveric islets validated ivermectin as a glucose-dependent secretagogue. Genetic, genomic, and pharmacologic analyses established that the molecular clock controls the expression of the purinergic P2Y1 receptor to mediate the insulinotropic activity of ivermectin. These findings identify the P2Y1 purinergic receptor as a target to rescue circadian  $\beta$ -cell failure and establish a chemical genetic screen for endocrine therapeutics.

1 **MAIN TEXT**

2

3 **INTRODUCTION:**

4

5 Type 2 diabetes is an escalating epidemic caused by interactions between genes and the  
6 environment, resulting in the co-occurrence of  $\beta$ -cell failure in the setting of insulin resistance.  
7 Recent epidemiologic evidence has shown that shift work and sleep disturbance are risk factors  
8 for diabetes (1), while genetic studies have revealed that disruption of the circadian clock within  
9 cells of the endocrine pancreas leads to impaired insulin exocytosis and hypoinsulinemic  
10 hyperglycemia (2, 3). At the molecular and cellular level, the circadian clock is composed of a  
11 transcriptional feedback loop in which CLOCK/BMAL1 in the forward limb drive the expression  
12 of the repressors PER1/2/3 and CRY1/2 within the negative limb that feedback to inhibit  
13 CLOCK/BMAL1 in a cycle that repeats itself every 24-hr. An additional stabilizing loop involving  
14 ROR/REV-ERB regulates BMAL1 expression (4). Recent small molecule screens have identified  
15 an expanded repertoire of factors that modulate the core clock, including casein kinase 1 inhibitors  
16 that lengthen the circadian period through regulation of the PER proteins (5, 6) and direct  
17 modulators of cryptochrome stability that exhibit glucoregulatory properties *in vivo* (7). Clock  
18 modulators may also impact metabolic homeostasis at the whole animal level (8), though achieving  
19 specificity for nuclear receptors via small molecule approaches remains challenging (9). One  
20 intriguing possibility is that small molecules may be leveraged to repair defects downstream of  
21 circadian disruption rather than through manipulation of the core clock itself.

22

23 Given that cell-intrinsic disruption of the circadian clock in mammals leads to  $\beta$ -cell failure (2, 10,  
24 11), we sought to determine whether specific methods to correct insulin secretory defects  
25 downstream of the circadian clock might identify key pathways in insulin secretion and new  
26 therapeutic targets. To this end, we implemented a high-throughput luminescence-based screen of  
27 a library of 2,640 drug or drug-like compounds for the induction of insulin secretion in the context  
28 of  $\beta$ -cell circadian gene disruption. Our results identified the macrolide ivermectin as an insulin  
29 secretagogue which activates the P2Y1 purinergic receptor. We further identified the P2Y1  
30 receptor as a direct transcriptional target of the molecular clock and a potent regulator of glucose-

31 dependent calcium signaling and metabolism. Our findings establish a chemical genetic strategy  
32 to identify novel endocrine cell therapeutics.

33

## 34 **RESULTS:**

35

36 **High-throughput screen for chemical modulators of insulin secretion in circadian mutant  $\beta$**   
37 **cells.** Based upon our finding that circadian genes regulate insulin secretion and  $\beta$ -cell survival,  
38 we developed a phenotype-driven chemical genetic screening platform to identify small molecules  
39 that enhance insulin secretion in a cell-based model of circadian  $\beta$ -cell failure (**Fig 1A**). We  
40 previously generated clonal *Bmal1*<sup>-/-</sup> Beta-TC-6  $\beta$ -cell lines that eliminate an exon encoding the  
41 basic-helix-loop-helix (bHLH) DNA binding domain (11). We found that these BMAL1-ablated  
42  $\beta$ -cell lines recapitulate the secretory defects observed in primary clock-deficient islets (2, 10). We  
43 next generated stable WT and *Bmal1*<sup>-/-</sup>  $\beta$ -cell lines with a luciferase readout for insulin secretion  
44 using an insulin-NanoLuciferase (NanoLuc)-expressing lentivirus (**Fig 1B**). We validated the  
45 direct correspondence between insulin-NanoLuc bioluminescence and levels of peptide secretion  
46 under increasing physiologic concentrations of glucose (2–20 mM) ( $R^2=0.8937$ ) (**Fig 1C**). We  
47 further confirmed impaired insulin secretion by reduced bioluminescence in *Bmal1*<sup>-/-</sup> compared to  
48 WT  $\beta$ -cell lines expressing insulin-NanoLuc in response to stimulatory concentrations of glucose  
49 (20 mM), potassium chloride, forskolin, and the phosphodiesterase inhibitor 3-isobutyl-1-  
50 methylxanthine (IBMX) (**Fig 1D**). We also validated the use of the diacylglycerol mimetic phorbol  
51 12-myristate 13-acetate (PMA) as a positive control for the screen ( $Z'$ -factor score 0.69) (**Fig 1D-**  
52 **F**) (10).

53

54 **Identification and validation of high throughput screen lead compounds in murine islets at**  
55 **high and low glucose concentrations.** We next used insulin-NanoLuc-expressing *Bmal1*<sup>-/-</sup>  $\beta$ -cell  
56 lines to screen 2,640 drugs and drug-like molecules from the Spectrum Collection (MicroSource  
57 Discovery Systems, Inc, New Milford, CT) to identify compounds that enhance insulin secretion  
58 (**Fig 1E**). Insulin-NanoLuc-expressing *Bmal1*<sup>-/-</sup> Beta-TC-6 cells were plated at 40,000 cells/well  
59 in a total of nine 384-well plates, incubated for 3 days, and then treated for 1 hr with either (i) 20  
60 mM glucose alone (negative control which elicits reduced insulin secretion in *Bmal1*<sup>-/-</sup> cells), (ii)  
61 20 mM glucose plus 10  $\mu$ M of one of the 2,640 compounds, or (iii) 20 mM glucose plus 10  $\mu$ M

62 PMA (positive control known to enhance insulin secretion in both *Bmal1*<sup>-/-</sup> mouse islets and Beta-  
63 TC-6 cells) (10). Luciferase intensity from the supernatant was measured following exposure to  
64 NanoGlo Luciferase Assay Substrate (**Fig 1E**).

65  
66 We initially identified 19 hit compounds that both significantly enhanced insulin secretion and  
67 elicited a response of greater than 3 standard deviations from the mean ( $Z$  score  $> 3$ ) with more  
68 than a 1.25-fold increase, exceeding the upper 99% confidence interval of the negative control  
69 (**Fig 2A, Fig S1A, Table S1**). Of these, seven were excluded from further analysis because of  
70 reported toxic effects or lack of availability of the compound (**Fig S1A**). The remaining 12 hit  
71 compounds mediate activity of ligand-gated cell surface receptors and ion channels that stimulate  
72 second messenger signaling cascades (**Fig 2B-C**) (12, 13). Of these, four target ion channels  
73 (tacrine hydrochloride, suloctidil, dyclonine hydrochloride, and ivermectin) (**Figs 2B-C**) (14-23).  
74 Five target seven-transmembrane G-protein coupled receptors (GPCRs) that signal through  
75 phospholipase C (PLC) and diacylglycerol (DAG) to activate insulin secretion and  $\beta$ -cell gene  
76 transcription (benzalkonium chloride, carbachol, isoetharine mesylate, pipamperone, and  
77 ivermectin) (**Figs 2B-C**) (17, 24-30). Similar to the hit compounds of our screen, our previous  
78 results showed that carbachol, a muscarinic G<sub>q</sub>-coupled receptor agonist, and the DAG mimetic  
79 PMA rescue insulin secretion in *Bmal1*<sup>-/-</sup> islets (10). Four additional hit compounds act as  
80 acetylcholinesterase inhibitors, promoting enhanced glucose-dependent insulin secretion in  
81 response to acetylcholine through the muscarinic GPCRs, as well as the ionotropic nicotinic  
82 acetylcholine receptors (tyrothricin, tomatine, carbachol, and tacrine hydrochloride) (**Figs 2B-C**)  
83 (31-36). One compound has been shown to promote insulin secretion by inhibition of the  
84 mitochondrial protein tyrosine phosphatase PTPM1 (alexidine hydrochloride) (**Figs 2B-C**) (37,  
85 38), and another likely affects  $\beta$ -cell function by signaling through the mineralocorticoid receptor  
86 (deoxycorticosterone) (**Figs 2B-C**) (39). Finally, in addition to ion channels and GPCRs, the  
87 macrolide ivermectin has also been shown to signal in micromolar concentrations through several  
88 ionotropic receptors, including purinergic, GABAergic, and glycine receptors, as well as through  
89 the farnesoid X nuclear receptor (17, 40, 41).

90  
91 Ten of these twelve hit compounds were not considered for further analysis because of either the  
92 high dose required to achieve insulin secretion (**Fig S1B**) or because they augmented insulin

93 release in low basal glucose (2 mM) in intact WT mouse primary islets (**Fig 2D**). One of the  
94 remaining compounds induces hepatotoxicity after prolonged use (tacrine hydrochloride) (42). We  
95 therefore focused our attention on ivermectin (IVM) due to its dose-dependent enhancement of  
96 glucose-stimulated insulin secretion in insulin-NanoLuc-expressing Beta-TC-6 cells, as well as its  
97 robust rescue of insulin secretion in *Bmal1*<sup>-/-</sup> islets (**Fig 2D-E**).

98

99 **Lead compound ivermectin regulates glucose-stimulated calcium flux and insulin exocytosis**

100 **in *Bmal1* mutant islets.** To test whether IVM drives GSIS in  $\beta$ -cell lines and primary mouse islets,  
101 we first assessed the impact of both acute treatment (1-hr) and overnight exposure (24-hr) with 10  
102  $\mu$ M IVM on the ability of WT  $\beta$  cells and mouse islets to secrete insulin (**Figs 3A, S2A**). Consistent  
103 with our initial bioluminescence assay, we observed that IVM enhanced insulin secretion in a  
104 glucose-dependent manner following both 1-hr IVM exposure and 24-hr pre-treatment with IVM  
105 in  $\beta$ -cell lines and WT mouse islets, suggesting both acute and longer-term exposure to IVM  
106 enhances  $\beta$ -cell function (**Figs 3A, S2A**). Since there was not a significant increase in insulin  
107 secretion with overnight (~2 fold) compared to acute (~1.5-1.6 fold) IVM exposure, further  
108 analysis of IVM as a potentiator of insulin secretion was performed only with acute treatment.

109

110 Chemical energy from ATP generated by glucose metabolism within the  $\beta$  cell triggers closure of  
111 the sulfonylurea-linked potassium channel, depolarization of the plasma membrane, and opening  
112 of voltage-gated calcium channels leading to stimulus-secretion coupling. To assess the  
113 mechanism of IVM-induced insulin secretion, we next monitored real-time calcium influx using  
114 ratiometric fluorescence imaging in WT  $\beta$  cells in the presence of both glucose and IVM. We  
115 observed an immediate and robust glucose-stimulated intracellular calcium response within 2  
116 minutes of IVM stimulation ( $p < 0.05$ ) (**Fig 3B**). Importantly, this effect was only observed in the  
117 presence of high glucose, consistent with results of our initial NanoLuc 384-well plate screening  
118 and subsequent ELISA-based analyses of glucose-stimulated insulin secretion. In contrast, the  
119  $Ca^{2+}$  channel inhibitor isradipine completely suppressed  $Ca^{2+}$  influx and insulin secretion (**Fig**  
120 **S2D-E**) (43). To determine whether increased calcium influx corresponded with productive insulin  
121 release following IVM treatment, we used a perfusion system to directly measure NanoLuc  
122 activity in eluates harvested from IVM-treated  $\beta$  cells during both the first and second phase of  
123 insulin secretion (**Fig 3C**). IVM significantly increased insulin release by 12 minutes post-

124 stimulation ( $p < 0.05$ ) and throughout most of the second phase of insulin secretion ( $> 15$  min),  
125 consistent with continuous release of reserve insulin granules (44) (**Fig 3C**).

126

127 Since our cell-based studies indicated that IVM stimulates GSIS within immortalized  $\beta$ -cell lines,  
128 we next sought to determine whether IVM restores insulin secretion in the context of circadian  
129 disruption within primary islets, which are composed of multiple hormone-releasing cell types  
130 (45). To test this idea, we administered IVM to mouse islets isolated from pancreas-specific *Bmall*<sup>-/-</sup>  
131 mice, revealing a 3.3-fold elevation of GSIS following exposure to the drug in the mutant islets  
132 (**Fig 3D**). To determine if IVM can improve glucose homeostasis in diabetic animals, we next  
133 tested the effects of chronic IVM administration in the well-characterized *Akita* model of  $\beta$ -cell  
134 failure (46). Daily intraperitoneal IVM (1.3 mg/kg body weight) was administered to *Akita* mice  
135 over a 14-day period (47), terminating in assessment of glucose tolerance and *ex vivo* GSIS.  
136 Treatment with IVM significantly improved glucose tolerance and augmented glucose-stimulated  
137 insulin release from islets isolated from these mice (**Fig S2B-C**). Given that our prior genomic and  
138 cell physiologic studies have localized the  $\beta$ -cell defect in circadian mutant mice to impaired  
139 insulin exocytosis (11), and as IVM augmented insulin secretion in *Bmall* mutant islets, we next  
140 sought to determine whether IVM might enhance depolarization-induced exocytosis using  
141 electrophysiologic analyses (48). We assessed cumulative capacitance, a measure of increased cell  
142 surface area as insulin granules fuse to the plasma membrane, in  $\beta$  cells from islets of control and  
143 pancreas-specific *Bmall* mutant mice, as well as from human cadaveric islets. While *Bmall* mutant  
144 cells displayed reduced rates of exocytosis following direct depolarization (as indicated by reduced  
145 capacitance), 10  $\mu$ M IVM treatment rescued the defect in *Bmall* mutant cells, increasing  
146 cumulative capacitance from 11.0 to 20.7 fF/pF after 10 consecutive depolarization steps (**Fig 3E**).  
147 IVM treatment also enhanced cumulative capacitance in human  $\beta$  cells from 17.9 to 39.7 fF/pF  
148 (**Fig 3F**). Together these data show that IVM augments  $\beta$ -cell early calcium influx in a glucose-  
149 dependent manner to promote increased vesicle fusion and release.

150

151 **Purinergic receptor P2Y1 mediates IVM-induced insulin exocytosis.** In addition to IVM,  
152 several of the predicted targets of the insulinotropic compounds from our screen involve second-  
153 messenger signaling, raising the possibility that circadian disruption may be overcome by  
154 augmenting hormonal or metabolic factors that promote peptide exocytosis. IVM is a readily-

155 absorbable and potent derivative of avermectin B<sub>1</sub> that acts to allosterically regulate several  
156 different types of cell surface receptors, including the purinergic and GABA receptors, as well as  
157 nuclear transcription factors such as the farnesoid X receptor (FXR) (47, 49-51). Since IVM  
158 augments insulin secretion in *Bmal1*<sup>-/-</sup> cells, we hypothesized that the expression of putative IVM  
159 targets may be reduced during circadian disruption. First, through RNA-sequencing we observed  
160 significantly higher levels of expression of the transcript encoding the purinergic receptor P2Y1  
161 (*P2ry1*) in WT  $\beta$  cells compared to transcripts encoding FXR or GABA components (**Fig S3A**).  
162 We further observed enrichment of BMAL1 chromatin binding within enhancer regions 266 - 41  
163 kb upstream of the *P2ry1* gene transcription start site by chromatin immunoprecipitation-  
164 sequencing (GSE69889) (**Fig 4A**), as well as rhythmic expression of *P2ry1* in wild-type Beta-TC-  
165 6 pseudoislets (**Fig S3B**). Finally, we observed a 3.1-fold reduction (Adj. P = 10<sup>-55</sup>) in expression  
166 of *P2ry1* in circadian mutant  $\beta$  cells (**Figs 4A, S3A**) (GSE146916), suggesting a direct role of the  
167 circadian clock in *P2ry1* expression.

168

169 Based upon evidence that IVM targets purinergic receptors (52, 53), that *P2ry1* is within the top  
170 12% of expressed transcripts in the murine  $\beta$  cell (by transcripts per million), and that BMAL1  
171 specifically controls *P2ry1* amongst the purinergic receptor family in the  $\beta$  cell (**Figs 4A, S3A-B**),  
172 we sought to test the functional role of the P2Y1 receptor in the insulinotropic action of IVM.  
173 Pharmacologic inhibition of P2Y1 using the subtype-specific inhibitor MRS2179 in the presence  
174 of both high glucose and 10  $\mu$ M IVM resulted in a 52% reduction in insulin secretion by  
175 bioluminescence and a reduction in calcium influx to levels similar to those observed during high  
176 glucose alone, as assessed by Fura2-AM ratiometric determination of intracellular calcium (**Figs**  
177 **4B-C**). In addition to evidence that pharmacological blockade of P2Y1 receptor signaling  
178 abrogates IVM activity, we also tested the requirement of P2Y1 receptor signaling following  
179 CRISPR-Cas9-mediated knockout of the P2Y1 receptor in both WT and *Bmal1*<sup>-/-</sup>  $\beta$  cells (**Fig S4A**).  
180 While IVM enhanced glucose-stimulated insulin secretion in WT and *Bmal1*<sup>-/-</sup>  $\beta$  cells by 60% and  
181 80%, respectively, IVM did not significantly enhance glucose-stimulated insulin secretion in cells  
182 lacking the P2Y1 receptor (**Fig 4D**). Similar to the pharmacologic findings with the P2Y1  
183 antagonist MRS2179, these results demonstrate a requirement for P2Y1 in IVM-induced GSIS.

184



185 P2Y1R signaling involves activation of Ca<sup>2+</sup> entry and intracellular release, which results in both  
186 acute stimulation of insulin granule trafficking and activation of transcription factors that may be  
187 involved in  $\beta$ -cell function (54-56). To analyze gene expression changes induced by P2Y1  
188 activation, we performed RNA-sequencing to compare the IVM response within both WT and  
189 *P2ry1*<sup>-/-</sup>  $\beta$  cells following stimulation with glucose or glucose plus IVM. Principal component  
190 analysis (PCA) was performed using log-transformed count data from the top 500 most variable  
191 genes across all samples (57). This revealed distinct patterns in mRNA expression between IVM-  
192 and control-treated WT cells along PC2, while there was no separation between IVM- and control-  
193 treated *P2ry1*<sup>-/-</sup>  $\beta$  cells, suggesting that P2Y1 is required for IVM-mediated transcriptional changes  
194 in  $\beta$  cells (**Fig 4E**). In WT cells, IVM induces differential expression of 65 transcripts (1.5-fold  
195 change, Adj. P value < 0.05), including up-regulation of the immediate early gene *Fos* (58) and  
196 down-regulation of *Aldolase B*, whose expression has been linked to reduced insulin secretion in  
197 human islets (59) (**Figs 4F, S4B**). Strikingly, none of these transcripts were significantly altered  
198 by IVM in the *P2ry1*<sup>-/-</sup>  $\beta$  cells (all adjusted P value > 0.05) (**Figs 4F, S4B**). Taken together, these  
199 data suggest that the circadian clock program controls P2Y1 expression to modulate glucose-  
200 stimulated insulin secretion and highlight the utility of a genetic-sensitized drug screen for  
201 identification of therapeutic targets in circadian dysregulation and diabetes.

202

## 203 **DISCUSSION:**

204

205 We have identified an unexpected role for the P2Y1 receptor as a BMAL1-controlled  
206 insulinotropic factor required for enhanced  $\beta$ -cell glucose-stimulated Ca<sup>2+</sup> influx and insulin  
207 secretion in response to IVM. While P2Y receptors have been previously implicated in calcium  
208 and insulin secretory dynamics in  $\beta$  cells, modulation has been primarily demonstrated using  
209 agonists that mimic ATP/ADP derivatives that have deleterious effects on thrombosis (54-56, 60).  
210 Little is known about P2Y1 targeting in disease states, such as circadian disruption and/or type 2  
211 diabetes, or whether P2Y1 is controlled at a transcriptional level. Our evidence that P2Y1 is  
212 expressed under control of the circadian clock derives from analyses at the level of both chromatin  
213 binding by the core clock factor BMAL1 and genome-wide differential RNA expression analysis  
214 in circadian mutants. Intriguingly, P2X and P2Y receptors are required for Ca<sup>2+</sup> signaling in the  
215 suprachiasmatic nucleus (61, 62), yet their role in circadian regulation of peripheral tissues has not

216 been well studied. Our pharmacological and genetic analyses are the first to reveal that  
217 enhancement of P2Y1 receptor activity can bypass the transcriptional deficits exhibited in  
218 circadian mutant  $\beta$  cells and restore insulin secretion. Future studies will be required to determine  
219 the precise mechanism by which IVM modulates P2Y1 activity. One possibility is that IVM may  
220 augment P2X-P2Y1 crosstalk to drive insulin secretion, which has been shown to drive  $\text{Ca}^{2+}$  and  
221 P2Y1-dependent activation of other cell types (52, 63).

222

223 Previous physiologic and transcriptomic studies have shown that circadian regulation of insulin  
224 exocytosis involves control of the expression and activity of cell-surface receptors and second  
225 messenger systems (10, 64). We based our drug screen on the idea that modulators of insulin  
226 secretion in cells that lack a functional clock would complement prior genomic analyses revealing  
227 circadian control of peptidergic hormone exocytosis and also to provide proof-of-principle that the  
228 clock can be leveraged to sensitize screening for new chemical modulators of  $\beta$ -cell function. This  
229 approach identified  $\text{Ca}^{2+}$ -dependent pathways as a potential route to ameliorate circadian  
230 disruption and to enhance glucose-stimulated insulin secretion. Importantly, several of the  
231 compounds identified in our screen have been used in disease treatment and have known  
232 mechanisms of action, including the cholinergic activators carbachol and tacrine (65, 66). The  
233 identification of these compounds in our screen raises the intriguing possibility of using drug  
234 derivatives related to these molecules for type 2 diabetes treatment, particularly in the context of  
235 circadian/sleep disruption.

236

237 The study of transcriptional rhythms across the 24-hr circadian cycle has previously revealed a  
238 diverse landscape of clock-controlled genes and pathways (67). Despite the identification of  
239 thousands of tissue-specific and clock-controlled transcripts, limited advances have been made in  
240 utilizing this information to treat diseases associated with circadian disruption, including type 2  
241 diabetes. One approach to this challenge has been to intervene and restore the molecular clock  
242 program using pharmacology (Nobiletin) (8), micronutrient supplementation ( $\text{NAD}^+$  precursors)  
243 (68, 69), or enforced behavioral rhythms (such as time restricted feeding) (70). However, it remains  
244 unclear how altering the whole-body clock will affect nutritional and hormonal dynamics at a  
245 cellular level. Another approach has been to directly target clock-controlled genes with known  
246 function in health and disease (71), or to look at gain/loss of circadian control in health versus

247 disease (72). This approach requires an understanding of gene function within a given tissue, and  
248 thus limits the identification of novel therapeutic targets. In the studies performed here we sought  
249 to address the challenge of connecting clock control of transcription with druggable targets by  
250 using an unbiased small molecule drug screen, in tandem with functional genomics, to elucidate  
251 mechanisms of insulin secretory dynamics. Since the circadian timing system has been shown to  
252 not only regulate the function of mature  $\beta$  cells, but also the regenerative capacity of islets in both  
253 the context of the mouse (73) and in human embryonic stem cell differentiation (74), molecules  
254 identified in cell-based genetic screens may provide broad applicability as therapeutics.

255 **Materials and Methods:**

256

257 **Reagents.** Ivermectin, (+)-Bicuculline, and MRS2179 tetrasodium salt were obtained from Tocris  
258 (R&D Systems, Inc, Minneapolis, MN). Isradipine was purchased from Cayman Chemical  
259 Company (Ann Arbor, MI). Exendin-4, PMA, guggulsterone, carbamoylcholine chloride  
260 (carbachol), forskolin, tyrothricin, alexidine hydrochloride, and benzalkonium chloride were  
261 obtained from Sigma-Aldrich (St. Louis, MO). Suloctidil, tomatine, isoetharine mesylate, tacrine  
262 hydrochloride, pipamperone, dyclonine hydrochloride, and desoxycorticosterone acetate were  
263 purchased from MicroSource Discovery Systems.

264

265 **Animals.** Male WT C57BL6J mice and C57BL/6-*Ins2<sup>Akita</sup>*/J mice were purchased from the  
266 Jackson Laboratory (Bar Harbor, ME). *PdxCre;Bmal1<sup>flx/flx</sup>* mice were produced and maintained on  
267 C57BL6J background at Northwestern University Center for Comparative Medicine (75). Unless  
268 otherwise stated, animals were maintained on a 12:12 light:dark cycle and allowed free access to  
269 water and regular chow. All animal care and use procedures were conducted in accordance with  
270 regulation of the Institutional Animal Care and Use Committee at Northwestern University.

271

272 **Cell Culture.** Beta-TC-6 cells were obtained from ATCC (Manassas, VA) (CRL-11506), and  
273 *Bmal1<sup>-/-</sup>* Beta TC-6  $\beta$ -cell lines were previously derived as described (11). Cells were cultured in  
274 Dulbecco's Modified Eagle's Medium (DMEM; Gibco, Aramillo, TX) supplemented with 15%  
275 fetal bovine serum (BioTechne, Minneapolis, MN), 1% penicillin-streptomycin (Gibco), and 1%  
276 L-glutamine (Gibco) at 37°C with 5% CO<sub>2</sub>. Culture medium was exchanged every 2-3 days. All  
277 cells used in experiments were at <15 passages.

278

279 **Generation of WT and *Bmal1<sup>-/-</sup>* Beta-TC-6 cells stably expressing insulin-NanoLuc.** We used  
280 the proinsulin-NanoLuc plasmid (David Altshuler, Addgene plasmid #62057) to provide a low  
281 cost, scalable, and rapid method to detect insulin secretion. The gene encoding NanoLuciferase  
282 was cloned into the C-peptide portion of mouse proinsulin such that cleavage within insulin  
283 vesicles by pH-sensitive prohormone convertase results in the co-secretion of NanoLuc with  
284 endogenous insulin in a stimulus-dependent manner (76). The pLX304 lentivirus packaging  
285 plasmid containing the proinsulin-NanoLuc construct was transfected into HEK293T (ATCC

286 CRL-11268) cells with pCMV-VSVG (envelope vector) and 8.91 (packaging vector) (obtained  
287 from Jeff Milbrandt, Washington University in St. Louis). Supernatant containing lentivirus  
288 particles was harvested 48 hrs after transfection. Beta-TC-6 and *Bmal1*<sup>-/-</sup> Beta TC-6 cells were  
289 infected with insulin-NanoLuc lentivirus, and stably expressing cells were selected by treating  
290 with puromycin (2 µg/ml, 2 days).

291

292 **CRISPR-mediated *P2ry1* deletion in WT and *Bmal1*<sup>-/-</sup> Beta TC-6 cells.** Exon 1 of the mouse  
293 *P2yr1* gene was deleted in WT and *Bmal1*<sup>-/-</sup> Beta-TC-6 cells by CRISPR-Cas9 and homology-  
294 directed repair (HDR). Cells were co-transfected with guide RNA, P2Y1 CRISPR/Cas9 KO, and  
295 P2Y1 HDR plasmids (Santa Cruz Biotechnology, Dallas, TX) by Lipofectamine 2000 (Thermo  
296 Fisher Scientific, Amarillo, TX). After 48 hrs of transfection, stably-integrated clones were  
297 selected for puromycin resistance (puromycin dihydrochloride, Sigma-Aldrich). RNA and protein  
298 were extracted from these colonies and *P2ry1* expression was assessed by qPCR and Western blot.

299

300 **High-throughput screen for drugs to restore insulin secretion in *Bmal1*<sup>-/-</sup> β cells and insulin**  
301 **secretion assays.** The Spectrum Collection small molecule compound library (MicroSource  
302 Discovery Systems, Inc), which consists of 2,640 known drugs and drug-like molecules, was  
303 screened for compounds that augment insulin secretion in *Bmal1*<sup>-/-</sup> Beta-TC-6 cells. Insulin-  
304 NanoLuc-expressing *Bmal1*<sup>-/-</sup> Beta-TC-6 cells (40,000 cells/well) were placed into 384 well plates  
305 and cultured for 3 days at 37°C and 5% CO<sub>2</sub>. The cells were washed once and incubated in KRB  
306 buffer containing 0mM glucose for 1 hr. Then, KRB buffer containing 20 mM glucose in addition  
307 to the small molecules (10 µM) were added, and the cells were incubated for 1 hr. As a negative  
308 control, 16 wells received KRB buffer with only 20 mM glucose, which fails to elicit appropriate  
309 insulin secretion in *Bmal1*<sup>-/-</sup> cells, and as a positive control, 16 wells received KRB buffer  
310 containing 20 mM glucose and 10µM PMA, which is known to induce insulin secretion in both  
311 *Bmal1*<sup>-/-</sup> mouse islets and Beta-TC-6 cells (10). After 1 hr, the supernatant was collected and  
312 centrifuged at 500g for 30 min. The supernatant was transferred into a fresh 384-well assay plate  
313 containing NanoGlo Luciferase Assay Substrate (Promega, Madison, WI), and luciferase intensity  
314 was measured by EnSpire Plate Reader (PerkinElmer, Waltham, MA) within 30 minutes. All  
315 liquids for the high-throughput screen were dispensed using Tecan Fluent Automated Liquid  
316 Handling Platform (Tecan, Mannedorf, Switzerland) at the High-Throughput Analysis Laboratory

317 at Northwestern University. Screen feasibility was determined by calculating Z'-factor using the  
318 following formula:  $Z' \text{-factor} = 1 - 3(\sigma_p + \sigma_n) / (\mu_p - \mu_n)$  (where  $\sigma_p$  is the standard deviation of positive  
319 control,  $\sigma_n$  is the standard deviation of negative control,  $\mu_p$  is the mean intensity of positive control,  
320 and  $\mu_n$  is the mean intensity of the negative control).

321  
322 **Determination of hit compounds.** Z scores for luciferase intensities produced by screened  
323 compounds were calculated from the following formula:  $z = (X - \mu) / \sigma$  (where z is the Z score, X  
324 is the intensity of the compounds,  $\mu$  is the intensity of negative control (20mM glucose), and  $\sigma$  is  
325 the standard deviation of negative control). A row-based correction factor was applied to all  
326 luciferase readings to adjust for logarithmic signal decay. Hit compounds were defined as those  
327 that elicited a response of greater than 3 standard deviations from the mean (Z score > 3) and more  
328 than 1.25-fold increase compared to negative control, which is the cut-off for ~10% chance of the  
329 observation occurring by random chance. Validated hit compounds that augmented insulin  
330 secretion at low drug dose were considered lead compounds.

331  
332 **Insulin secretion assays in pancreatic islets, pseudoislets, and cell lines.** Mouse pancreatic islets  
333 were isolated via bile duct collagenase digestion (*Collagenase P*, Sigma) and Biocoll (Millipore)  
334 gradient separation and left to recover overnight at 37°C in RPMI 1640 with 10% FBS, 1% L-  
335 glutamine, and 1% penicillin/streptomycin. For insulin release assays, duplicates of 5 equally-  
336 sized islets per mouse were statically incubated in Krebs-Ringer Buffer (KRB) at 2 mM glucose  
337 for 1 hr and then stimulated for 1 hr at 37°C with 2 mM or 20 mM glucose in the presence or  
338 absence of 10  $\mu$ M of each compound. Supernatant was collected and assayed for insulin content  
339 by ELISA (Crystal Chem Inc, Elk Grove Village, IL). Islets were then sonicated in acid-ethanol  
340 solution and solubilized overnight at 4°C before assaying total insulin content by ELISA. For  
341 insulin release assays from pseudoislets,  $3 \times 10^6$  cells were plated for 3 days in 60 mm suspension  
342 dishes and allowed to form pseudoislets for 2-3 days. Glucose-responsive insulin secretion was  
343 performed as described above, using 10 pseudoislets per sample and a basal glucose level of 0 mM  
344 glucose instead of 2 mM. For secretion from insulin-NanoLuc cell lines,  $1 \times 10^5$  cells were cultured  
345 on poly-L-lysine coated 96 well plates for 2-3 days, starved for 1 hr in 0 mM glucose KRB, then  
346 stimulated with indicated compounds and/or receptor antagonists for 1 hr in conjunction with

347 indicated glucose concentrations. Luciferase intensity after addition of NanoGlo to supernatant  
348 was measured by Cytation3 Plate Reader (BioTek, Winooski, VT).

349

350 **Perfusion of pseudoislets.** Perfusion of 100 insulin-NanoLuc pseudoislets was performed using  
351 a Biorep Technologies Perfusion System Model PERI-4.2 with at a rate of 100  $\mu\text{L}/\text{min}$  KRB  
352 (0.2% BSA). After 1 hour of preincubation and equilibration at a rate of 100  $\mu\text{L}/\text{min}$  with 0 mM  
353 KRB, 0 mM glucose KRB was perfused for 10 minutes, followed by perfusion for 30 minutes  
354 with 20 mM or 20 mM plus IVM. Perfusate was collected in 96 well plates and analyzed for  
355 NanoLuc activity using NanoGlo Luciferase Assay Substrate (Promega) per manual instructions,  
356 substituting lysis buffer for KRB perfusate.

357

358 ***In vivo* ivermectin treatment and glucose measurements.** Mice were injected intraperitoneally  
359 for 14 days with 1.3 mg/kg body weight of IVM, which was dissolved in 40% w/v 2-  
360 hydroxypropyl- $\beta$ -cyclodextrin (Sigma-Aldrich) (47). At the end of IVM treatment, mice were  
361 fasted for 14 hrs and glucose tolerance tests were performed at ZT2 following intraperitoneal  
362 glucose injection at 2g/kg body weight. Plasma glucose levels were measured by enzymatic assay  
363 (Autokit Glucose, Wako-Fujifilm, Cincinnati, OH).

364 **Synchronization, RNA isolation, and qPCR mRNA quantification.** Where indicated, circadian  
365 synchronization was performed using 200 WT pseudoislets by first exposing cells to 10  $\mu\text{M}$   
366 forskolin for one hour, followed by transfer to normal media and RNA collection every 4 hrs 24-  
367 44 hrs following forskolin synchronization pulse. RNA was extracted from Beta-TC-6 cells and  
368 pseudoislets using Tri Reagent (Molecular Research Center, Inc, Cincinnati, OH) and frozen at  
369  $-80^{\circ}\text{C}$ . RNA was purified according to the manufacturer's protocol using the Direct-zol<sup>TM</sup> RNA  
370 Microprep kit (Zymo Research, Irvine, CA) with DNase digestion. cDNAs were then synthesized  
371 using the High Capacity cDNA Reverse Transcription Kit (Applied Biosystems, Amarillo, TX).  
372 Quantitative real-time PCR analysis was performed with SYBR Green Master Mix (Applied  
373 Biosystems) and analyzed using a Touch<sup>TM</sup> CFX384 Real-Time PCR Detection System (Bio-Rad,  
374 Hercules, CA). Target gene expression levels were normalized to  $\beta$ -actin and set relative to control  
375 conditions using the comparative  $C_T$  method. Primer sequences for qPCR as follows:  $\beta$ -actin  
376 Forward: 5'- TGCTCTGGCTCCTAGCACCATGAAGATCAA-3' , Reverse: 5' -

377 AAACGCAGCTCAGTAACAGTCCGCCTAGAA-3; *P2ry1* Forward: 5' -  
378 TTATGTCAGCGTGCTGGTGT -3', Reverse: 5'- ACGTGGTGTGCATAGCAGGTG -3.

379 **RNA-sequencing and analysis.** Following RNA isolation (described above), RNA quality was  
380 assessed using a Bioanalyzer (Agilent, Santa Clara, CA), and sequencing libraries were  
381 constructed using a NEBNext® Ultra™ Directional RNA Library Prep Kit for Illumina (New  
382 England BioLabs, Ipswich, MA, E7420L) according to the manufacturer's instructions. Libraries  
383 were quantified using a NEBNext® Library Quant Kit for Illumina (New England BioLabs,  
384 E7630L) and sequenced on either an Illumina NextSeq 500 instrument using 42bp paired-end  
385 reads. For differential expression analysis, RNA raw sequence reads were aligned to the reference  
386 genome (mm10) using STAR version 2.7.2b, and raw and transcripts per million (TPM) count  
387 values determined using RSEM version 1.3.3. Differentially expressed RNAs were identified by  
388 an FDR-adjusted P value <0.05 and a fold change > 1.5 using DESeq2 version 1.32.0 in R 4.1.0.  
389 Heatmaps were generated using the pheatmap package in R. Raw mRNA sequencing data and  
390 gene abundance measurements have been deposited in the Gene Expression Omnibus under  
391 accession GSE186469.

392 **Intracellular calcium determination.** Beta-TC-6 cells were plated at a density of 100,000 cells  
393 per well in black 96-well plates with clear bottoms and cultured overnight at 37°C and 5% CO<sub>2</sub>.  
394 Cells were then washed with BSA-free KRB buffer with no glucose and loaded with 5 µM Fura-2  
395 (Invitrogen, Amarillo, TX) and 0.04% Pluronic F-127 (Invitrogen) for 30 min at 37°C. Following  
396 a wash with BSA-free KRB, Fura-2 intensity was measured after stimulation with either glucose  
397 alone or glucose plus the indicated compounds. Cells were alternately excited with 340 nm and  
398 380 nm wavelength light, and the emitted light was detected at 510 nm using a Cytation 3 Cell  
399 Imaging Multi-Mode Reader (BioTek) at sequential 30-second intervals. Raw fluorescence data  
400 were exported to Microsoft Excel and expressed as the 340/380 ratio for each well.

401 **Patch-clamp electrophysiology.** Patch-clamp measurement of exocytic responses in mouse β  
402 cells was performed as previously described (11). Human islets isolations approved by the Human  
403 Research Ethics Board (Pro00013094; Pro00001754) were performed at the Alberta Diabetes  
404 Institute Islet-Core according to methods deposited in the protocols.io repository (77). A total of  
405 three non-diabetic (ND) donors were examined in this study. Full details of donor information,



406 organ processing, and quality control information can be assessed with donor number (donors  
407 R224, R225, and R226 in this study) at [www.isletcore.ca](http://www.isletcore.ca). Dispersed human islets were cultured in  
408 low glucose (5.5 mM) DMEM media (supplemented with L-glutamine, 110 mg/l sodium pyruvate,  
409 10% FBS, and 100 U/ml penicillin/streptomycin) in 35-mm culture dishes overnight. On the day  
410 of patch-clamp measurements, human or mouse islet cells were preincubated in extracellular  
411 solution at 1 mM glucose for 1 hr and capacitance was measured at 10 mM glucose with DMSO  
412 or 10  $\mu$ M ivermectin as previously described (11). Mouse  $\beta$  cells were identified by cell size and  
413 by half-maximal inactivation of  $\text{Na}^+$  currents near -90 mV and human  $\beta$  cells were identified by  
414 immunostaining for positive insulin, following the experiment as described (48). Data analysis  
415 was performed using GraphPad Prism (v8.0c). Comparison of multiple groups was done by one-  
416 or two-way ANOVA followed by Bonferroni or Tukey post test. Data are expressed as means  $\pm$   
417 SEM, where  $P < 0.05$  is considered significant.

418 **Western blotting.** Beta-TC-6 cells lysates were isolated by treating cell pellets with RIPA buffer  
419 (Sigma-Aldrich) supplemented with 1x protease and 1x phosphatase inhibitors (Roche, Basel,  
420 Switzerland). Protein levels were quantified using DC Protein Assay (Bio-Rad), protein extracts  
421 were subject to SDS-PAGE gel electrophoresis and transferred to nitrocellulose membranes (GE  
422 Healthcare, Chicago, IL). Primary antibodies used were anti-P2Y1 (Santa Cruz, sc-377324) and  
423 anti- $\beta$ -ACTIN (Cell Signaling, Danvers, MA, CST 4970).

424

425 **Statistical analysis.** Results were expressed as mean  $\pm$  SEM unless otherwise noted. Information  
426 on sample size, genotype, and p values is provided within each figure and figure legend. Statistical  
427 significance of capacitance, Fura2, and perfusion data was performed using a two-way analysis  
428 of variance (ANOVA) or mixed effects model (for datasets with missing values) with repeated  
429 measures followed by multiple comparison tests using a Bonferroni P value adjustment via Prism  
430 (v9.2.0). Statistical analysis was performed by unpaired two-tailed Student's *t*-test unless  
431 otherwise indicated.  $P < 0.05$  was considered to be statistically significant. JTK\_Cycle (v3) was  
432 used to determine rhythmicity in qPCR data, using a period length of 24 hours and considering a  
433 Benjamini-Hochberg (BH)-adjusted P value  $< 0.05$  as statistically rhythmic (78).

434

435

436 **Acknowledgements:** We thank all members of the Bass laboratory, Dr. Grant Barish, Dr. Lisa  
437 Beutler, and Dr. Richard Miller for helpful discussions and comments on the manuscript. We also  
438 thank Shun Kobayashi for technical assistance. We thank the Human Organ Procurement and  
439 Exchange (HOPE) program and Trillium Gift of Life Network (TGLN) for their work in procuring  
440 human donor pancreas for research. Finally, we especially thank the organ donors and their  
441 families for their kind gift in support of diabetes research.

442

443 **Funding:** Research support was from the NIH National Institute of Diabetes and Digestive and  
444 Kidney Diseases (NIDDK) grants R01DK090625, R01DK127800, R01DK050203, and  
445 R01DK113011, the National Institute on Aging (NIA) grants P01AG011412 and R01AG065988,  
446 the Juvenile Diabetes Research Foundation (JDRF) grant 17-2013-511, and the Chicago  
447 Biomedical Consortium S-007 (to J.B.); the NIDDK T32 grant DK007169 (to B.M.); the National  
448 Research Service Award (NRSA) grant F30DK116481 (to B.J.W.); the Manpei Suzuki Diabetes  
449 Foundation fellowship (to A.T.); a Sino-Canadian Studentship from Shantou University (to H.L.);  
450 and the Canadian Institutes of Health Research (CIHR: 148451) (to P.E.M.).

451

452 **Author Contributions:** B.M., B.J.W., A.T., and J.B. designed research. B.M., B.J.W., A.T., M.P.,  
453 M.V.N., Y.K., C.O., J.E.M.F., and H.L. performed research. B.M., B.J.W., A.T., M.P. analyzed  
454 data. P.E.M. contributed conceptually. K.M.R., B.M., B.J.W., and J.B wrote the paper.

455

456

457 **Competing Interest Statement:** The authors declare no competing interests.

458

459

460 **Data Sharing Plans:** Data in this study is publicly available in the GEO repository GSE186469.

461 **References Cited:**

462

- 463 1. Perelis M, Ramsey KM, Marcheva B, Bass J. Circadian Transcription from Beta Cell  
464 Function to Diabetes Pathophysiology. *J Biol Rhythms*. 2016;31(4):323-36. Epub  
465 2016/07/22. doi: 10.1177/0748730416656949. PubMed PMID: 27440914.
- 466 2. Marcheva B, Ramsey KM, Buhr ED, Kobayashi Y, Su H, Ko CH, Ivanova G, Omura C, Mo  
467 S, Vitaterna MH, Lopez JP, Philipson LH, Bradfield CA, Crosby SD, Jebailey L, Wang X,  
468 Takahashi JS, Bass J. Disruption of the clock components CLOCK and BMAL1 leads to  
469 hypoinsulinaemia and diabetes. *Nature*. 2010;466(7306):571-2. Epub 2010/06/22. doi:  
470 nature09253 [pii]10.1038/nature09253. PubMed PMID: 20562852.
- 471 3. Sadacca LA, Lamia KA, deLemos AS, Blum B, Weitz CJ. An intrinsic circadian clock of  
472 the pancreas is required for normal insulin release and glucose homeostasis in mice.  
473 *Diabetologia*. 2011;54(1):120-4. Epub 2010/10/05. doi: 10.1007/s00125-010-1920-8.  
474 PubMed PMID: 20890745; PMCID: 2995870.
- 475 4. Kim YH, Lazar MA. Transcriptional Control of Circadian Rhythms and Metabolism: A  
476 Matter of Time and Space. *Endocr Rev*. 2020;41(5). Epub 2020/05/12. doi:  
477 10.1210/endrev/bnaa014. PubMed PMID: 32392281; PMCID: PMC7334005.
- 478 5. Hirota T, Lee JW, Lewis WG, Zhang EE, Breton G, Liu X, Garcia M, Peters EC, Etchegaray  
479 JP, Traver D, Schultz PG, Kay SA. High-throughput chemical screen identifies a novel  
480 potent modulator of cellular circadian rhythms and reveals CKIalpha as a clock regulatory  
481 kinase. *PLoS Biol*. 2010;8(12):e1000559. Epub 2010/12/24. doi:  
482 10.1371/journal.pbio.1000559. PubMed PMID: 21179498.
- 483 6. Chen Z, Yoo SH, Park YS, Kim KH, Wei S, Buhr E, Ye ZY, Pan HL, Takahashi JS.  
484 Identification of diverse modulators of central and peripheral circadian clocks by high-  
485 throughput chemical screening. *Proc Natl Acad Sci U S A*. 2012;109(1):101-6. Epub  
486 2011/12/21. doi: 10.1073/pnas.1118034108. PubMed PMID: 22184224; PMCID:  
487 PMC3252927.
- 488 7. Hirota T, Lee JW, St John PC, Sawa M, Iwaisako K, Noguchi T, Pongsawakul PY, Sonntag  
489 T, Welsh DK, Brenner DA, Doyle FJ, 3rd, Schultz PG, Kay SA. Identification of small  
490 molecule activators of cryptochrome. *Science*. 2012;337(6098):1094-7. Epub 2012/07/17.  
491 doi: 10.1126/science.1223710. PubMed PMID: 22798407.
- 492 8. He B, Nohara K, Park N, Park YS, Guillory B, Zhao Z, Garcia JM, Koike N, Lee CC,  
493 Takahashi JS, Yoo SH, Chen Z. The Small Molecule Nobiletin Targets the Molecular  
494 Oscillator to Enhance Circadian Rhythms and Protect against Metabolic Syndrome. *Cell*  
495 *Metab*. 2016;23(4):610-21. doi: 10.1016/j.cmet.2016.03.007. PubMed PMID: 27076076;  
496 PMCID: PMC4832569.
- 497 9. Dierickx P, Emmett MJ, Jiang C, Uehara K, Liu M, Adlanmerini M, Lazar MA. SR9009 has  
498 REV-ERB-independent effects on cell proliferation and metabolism. *Proc Natl Acad Sci U*  
499 *S A*. 2019;116(25):12147-52. Epub 2019/05/28. doi: 10.1073/pnas.1904226116. PubMed  
500 PMID: 31127047; PMCID: PMC6589768.
- 501 10. Perelis M, Marcheva B, Ramsey KM, Schipma MJ, Hutchison AL, Taguchi A, Peek CB,  
502 Hong H, Huang W, Omura C, Allred AL, Bradfield CA, Dinner AR, Barish GD, Bass J.  
503 Pancreatic beta cell enhancers regulate rhythmic transcription of genes controlling insulin  
504 secretion. *Science*. 2015;350(6261):aac4250. doi: 10.1126/science.aac4250. PubMed PMID:  
505 26542580; PMCID: 4669216.

- 506 11. Marcheva B, Perelis M, Weidemann BJ, Taguchi A, Lin H, Omura C, Kobayashi Y, Newman  
507 MV, Wyatt EJ, McNally EM, Fox JEM, Hong H, Shankar A, Wheeler EC, Ramsey KM,  
508 MacDonald PE, Yeo GW, Bass J. A role for alternative splicing in circadian control of  
509 exocytosis and glucose homeostasis. *Genes Dev.* 2020;34(15-16):1089-105. Epub  
510 2020/07/04. doi: 10.1101/gad.338178.120. PubMed PMID: 32616519; PMCID:  
511 PMC7397853.
- 512 12. Gaulton KJ, Nammo T, Pasquali L, Simon JM, Giresi PG, Fogarty MP, Panhuis TM,  
513 Mieczkowski P, Secchi A, Bosco D, Berney T, Montanya E, Mohlke KL, Lieb JD, Ferrer J.  
514 A map of open chromatin in human pancreatic islets. *Nature genetics.* 2010;42(3):255-9. doi:  
515 10.1038/ng.530. PubMed PMID: 20118932; PMCID: 2828505.
- 516 13. Carrano AC, Mulas F, Zeng C, Sander M. Interrogating islets in health and disease with  
517 single-cell technologies. *Mol Metab.* 2017;6(9):991-1001. Epub 2017/09/28. doi:  
518 10.1016/j.molmet.2017.04.012. PubMed PMID: 28951823; PMCID: PMC5605723.
- 519 14. Karlsson S, Ahren B. Effects of tacrine on insulin secretion and  $^{86}\text{Rb}^+$  and  $^{45}\text{Ca}^{++}$  efflux  
520 from rat pancreatic islets. *J Pharmacol Exp Ther.* 1992;263(2):494-8. Epub 1992/11/01.  
521 PubMed PMID: 1331400.
- 522 15. Chatelain P, Demol D, Roba J. Inhibition by suloctidil of  $[^3\text{H}]$  nitrendipine binding to  
523 cerebral cortex membranes. *Biochem Pharmacol.* 1984;33(7):1099-103. Epub 1984/04/01.  
524 doi: 10.1016/0006-2952(84)90520-3. PubMed PMID: 6324812.
- 525 16. Khanna M, Chen CH, Kimble-Hill A, Parajuli B, Perez-Miller S, Baskaran S, Kim J, Dria  
526 K, Vasiliou V, Mochly-Rosen D, Hurley TD. Discovery of a novel class of covalent inhibitor  
527 for aldehyde dehydrogenases. *J Biol Chem.* 2011;286(50):43486-94. Epub 2011/10/25. doi:  
528 10.1074/jbc.M111.293597. PubMed PMID: 22021038; PMCID: PMC3234859.
- 529 17. Chen IS, Kubo Y. Ivermectin and its target molecules: shared and unique modulation  
530 mechanisms of ion channels and receptors by ivermectin. *J Physiol.* 2018;596(10):1833-45.  
531 Epub 2017/10/25. doi: 10.1113/JP275236. PubMed PMID: 29063617; PMCID:  
532 PMC5978302.
- 533 18. Freeman SE, Lau WM, Szilagyi M. Blockade of a cardiac  $\text{K}^+$  channel by tacrine: interactions  
534 with muscarinic and adenosine receptors. *Eur J Pharmacol.* 1988;154(1):59-65. Epub  
535 1988/09/01. doi: 10.1016/0014-2999(88)90363-9. PubMed PMID: 3181293.
- 536 19. de Gaetano G, Miragliotta G, Roncucci R, Lansen J, Lambelin G. Suloctidil: a novel inhibitor  
537 of platelet aggregation in human beings. *Thromb Res.* 1976;8(3):361-71. Epub 1976/03/01.  
538 doi: 10.1016/0049-3848(76)90029-3. PubMed PMID: 1265708.
- 539 20. Kornhuber J, Tripal P, Reichel M, Terfloth L, Bleich S, Wiltfang J, Gulbins E. Identification  
540 of new functional inhibitors of acid sphingomyelinase using a structure-property-activity  
541 relation model. *J Med Chem.* 2008;51(2):219-37. Epub 2007/11/22. doi:  
542 10.1021/jm070524a. PubMed PMID: 18027916.
- 543 21. Sahdeo S, Scott BD, McMackin MZ, Jasoliya M, Brown B, Wulff H, Perlman SL, Pook MA,  
544 Cortopassi GA. Dyclonine rescues frataxin deficiency in animal models and buccal cells of  
545 patients with Friedreich's ataxia. *Hum Mol Genet.* 2014;23(25):6848-62. Epub 2014/08/13.  
546 doi: 10.1093/hmg/ddu408. PubMed PMID: 25113747; PMCID: PMC4245046.
- 547 22. Roghani S, Duperon DF, Barcohana N. Evaluating the efficacy of commonly used topical  
548 anesthetics. *Pediatr Dent.* 1999;21(3):197-200. Epub 1999/06/04. PubMed PMID:  
549 10355012.
- 550 23. Ikeda T. Pharmacological effects of ivermectin, an antiparasitic agent for intestinal  
551 strongyloidiasis: its mode of action and clinical efficacy. *Nihon Yakurigaku Zasshi.*

- 552 2003;122(6):527-38. Epub 2003/11/26. doi: 10.1254/fpj.122.527. PubMed PMID:  
553 14639007.
- 554 24. Higashijima T, Burnier J, Ross EM. Regulation of Gi and Go by mastoparan, related  
555 amphiphilic peptides, and hydrophobic amines. Mechanism and structural determinants of  
556 activity. *J Biol Chem*. 1990;265(24):14176-86. Epub 1990/08/25. PubMed PMID: 2117607.
- 557 25. Rinne A, Mobarec JC, Mahaut-Smith M, Kolb P, Bunemann M. The mode of agonist binding  
558 to a G protein-coupled receptor switches the effect that voltage changes have on signaling.  
559 *Sci Signal*. 2015;8(401):ra110. Epub 2015/11/05. doi: 10.1126/scisignal.aac7419. PubMed  
560 PMID: 26535008.
- 561 26. Bierman CW. Adrenergic drugs. *Clin Rev Allergy*. 1983;1(1):87-104. Epub 1983/03/01. doi:  
562 10.1007/BF02991319. PubMed PMID: 6142760.
- 563 27. Van Craenenbroeck K, Gellynck E, Lintermans B, Leysen JE, Van Tol HH, Haegeman G,  
564 Vanhoenacker P. Influence of the antipsychotic drug pipamperone on the expression of the  
565 dopamine D4 receptor. *Life Sci*. 2006;80(1):74-81. Epub 2006/09/19. doi:  
566 10.1016/j.lfs.2006.08.024. PubMed PMID: 16978659.
- 567 28. Nagata M, Yokooji T, Nakai T, Miura Y, Tomita T, Taogoshi T, Sugimoto Y, Matsuo H.  
568 Blockade of multiple monoamines receptors reduce insulin secretion from pancreatic beta-  
569 cells. *Sci Rep*. 2019;9(1):16438. Epub 2019/11/13. doi: 10.1038/s41598-019-52590-y.  
570 PubMed PMID: 31712714; PMCID: PMC6848069.
- 571 29. Ratajewski M, Grzelak I, Wisniewska K, Ryba K, Gorzkiewicz M, Walczak-Drzewiecka A,  
572 Hoffmann M, Dastyh J. Screening of a chemical library reveals novel PXR-activating  
573 pharmacologic compounds. *Toxicol Lett*. 2015;232(1):193-202. Epub 2014/12/03. doi:  
574 10.1016/j.toxlet.2014.10.009. PubMed PMID: 25455453.
- 575 30. Ohtani M, Ohura K, Oka T. Involvement of P2X receptors in the regulation of insulin  
576 secretion, proliferation and survival in mouse pancreatic beta-cells. *Cell Physiol Biochem*.  
577 2011;28(2):355-66. Epub 2011/08/26. doi: 10.1159/000331752. PubMed PMID: 21865744.
- 578 31. Changeux JP, Ryter A, Leuzinger W, Barrand P, Podleski T. On the association of tyrocidine  
579 with acetylcholinesterase. *Proc Natl Acad Sci U S A*. 1969;62(3):986-93. Epub 1969/03/01.  
580 doi: 10.1073/pnas.62.3.986. PubMed PMID: 5257018; PMCID: PMC223696.
- 581 32. Milner SE, Brunton NP, Jones PW, O'Brien NM, Collins SG, Maguire AR. Bioactivities of  
582 glycoalkaloids and their aglycones from *Solanum* species. *J Agric Food Chem*.  
583 2011;59(8):3454-84. Epub 2011/03/16. doi: 10.1021/jf200439q. PubMed PMID: 21401040.
- 584 33. Rosenberry TL, Sonoda LK, Dekat SE, Cusack B, Johnson JL. Analysis of the reaction of  
585 carbachol with acetylcholinesterase using thioflavin T as a coupled fluorescence reporter.  
586 *Biochemistry*. 2008;47(49):13056-63. Epub 2008/11/14. doi: 10.1021/bi8015197. PubMed  
587 PMID: 19006330; PMCID: PMC2655144.
- 588 34. Marco JL, Carreiras MC. Recent developments in the synthesis of acetylcholinesterase  
589 inhibitors. *Mini Rev Med Chem*. 2003;3(6):518-24. Epub 2003/07/23. doi:  
590 10.2174/1389557033487908. PubMed PMID: 12871155.
- 591 35. Lang C, Staiger C. Tyrothricin--An underrated agent for the treatment of bacterial skin  
592 infections and superficial wounds? *Pharmazie*. 2016;71(6):299-305. Epub 2016/07/28.  
593 PubMed PMID: 27455547.
- 594 36. Shih YW, Shieh JM, Wu PF, Lee YC, Chen YZ, Chiang TA. Alpha-tomatine inactivates  
595 PI3K/Akt and ERK signaling pathways in human lung adenocarcinoma A549 cells: effect  
596 on metastasis. *Food Chem Toxicol*. 2009;47(8):1985-95. Epub 2009/05/22. doi:  
597 10.1016/j.fct.2009.05.011. PubMed PMID: 19457446.

- 598 37. Doughty-Shenton D, Joseph JD, Zhang J, Pagliarini DJ, Kim Y, Lu D, Dixon JE, Casey PJ.  
599 Pharmacological targeting of the mitochondrial phosphatase PTPMT1. *J Pharmacol Exp*  
600 *Ther.* 2010;333(2):584-92. Epub 2010/02/20. doi: 10.1124/jpet.109.163329. PubMed PMID:  
601 20167843; PMCID: PMC2872949.
- 602 38. Nath AK, Ryu JH, Jin YN, Roberts LD, Dejam A, Gerszten RE, Peterson RT. PTPMT1  
603 Inhibition Lowers Glucose through Succinate Dehydrogenase Phosphorylation. *Cell Rep.*  
604 2015;10(5):694-701. Epub 2015/02/11. doi: 10.1016/j.celrep.2015.01.010. PubMed PMID:  
605 25660020; PMCID: PMC4524786.
- 606 39. Lu NZ, Wardell SE, Burnstein KL, Defranco D, Fuller PJ, Giguere V, Hochberg RB, McKay  
607 L, Renoir JM, Weigel NL, Wilson EM, McDonnell DP, Cidlowski JA. International Union  
608 of Pharmacology. LXV. The pharmacology and classification of the nuclear receptor  
609 superfamily: glucocorticoid, mineralocorticoid, progesterone, and androgen receptors.  
610 *Pharmacol Rev.* 2006;58(4):782-97. Epub 2006/11/30. doi: 10.1124/pr.58.4.9. PubMed  
611 PMID: 17132855.
- 612 40. Dawson GR, Wafford KA, Smith A, Marshall GR, Bayley PJ, Schaeffer JM, Meinke PT,  
613 McKernan RM. Anticonvulsant and adverse effects of avermectin analogs in mice are  
614 mediated through the gamma-aminobutyric acid(A) receptor. *J Pharmacol Exp Ther.*  
615 2000;295(3):1051-60. Epub 2000/11/18. PubMed PMID: 11082440.
- 616 41. Soltani N, Qiu H, Aleksic M, Glinka Y, Zhao F, Liu R, Li Y, Zhang N, Chakrabarti R, Ng  
617 T, Jin T, Zhang H, Lu WY, Feng ZP, Prud'homme GJ, Wang Q. GABA exerts protective and  
618 regenerative effects on islet beta cells and reverses diabetes. *Proc Natl Acad Sci U S A.*  
619 2011;108(28):11692-7. Epub 2011/06/29. doi: 10.1073/pnas.1102715108. PubMed PMID:  
620 21709230; PMCID: PMC3136292.
- 621 42. Galisteo M, Rissel M, Sergent O, Chevanne M, Cillard J, Guillouzo A, Lagadic-Gossman  
622 D. Hepatotoxicity of tacrine: occurrence of membrane fluidity alterations without  
623 involvement of lipid peroxidation. *J Pharmacol Exp Ther.* 2000;294(1):160-7. Epub  
624 2000/06/28. PubMed PMID: 10871308.
- 625 43. Berjukow S, Marksteiner R, Gapp F, Sinnegger MJ, Hering S. Molecular mechanism of  
626 calcium channel block by isradipine. Role of a drug-induced inactivated channel  
627 conformation. *J Biol Chem.* 2000;275(29):22114-20. Epub 2000/04/15. doi:  
628 10.1074/jbc.M908836199. PubMed PMID: 10766758.
- 629 44. Rorsman P, Renstrom E. Insulin granule dynamics in pancreatic beta cells. *Diabetologia.*  
630 2003;46(8):1029-45. Epub 2003/07/25. doi: 10.1007/s00125-003-1153-1. PubMed PMID:  
631 12879249.
- 632 45. Arrojo EDR, Roy B, MacDonald PE. Molecular and functional profiling of human islets:  
633 from heterogeneity to human phenotypes. *Diabetologia.* 2020;63(10):2095-101. Epub  
634 2020/09/08. doi: 10.1007/s00125-020-05159-8. PubMed PMID: 32894320.
- 635 46. Yoshioka M, Kayo T, Ikeda T, Koizumi A. A novel locus, Mody4, distal to D7Mit189 on  
636 chromosome 7 determines early-onset NIDDM in nonobese C57BL/6 (Akita) mutant mice.  
637 *Diabetes.* 1997;46(5):887-94. Epub 1997/05/01. doi: 10.2337/diab.46.5.887. PubMed  
638 PMID: 9133560.
- 639 47. Jin L, Feng X, Rong H, Pan Z, Inaba Y, Qiu L, Zheng W, Lin S, Wang R, Wang Z, Wang S,  
640 Liu H, Li S, Xie W, Li Y. The antiparasitic drug ivermectin is a novel FXR ligand that  
641 regulates metabolism. *Nat Commun.* 2013;4:1937. Epub 2013/06/04. doi:  
642 10.1038/ncomms2924. PubMed PMID: 23728580.

- 643 48. Fu J, Githaka JM, Dai X, Plummer G, Suzuki K, Spigelman AF, Bautista A, Kim R, Greitzer-  
644 Antes D, Fox JEM, Gaisano HY, MacDonald PE. A glucose-dependent spatial patterning of  
645 exocytosis in human beta-cells is disrupted in type 2 diabetes. *JCI Insight*. 2019;5. Epub  
646 2019/05/16. doi: 10.1172/jci.insight.127896. PubMed PMID: 31085831; PMCID:  
647 PMC6629118.
- 648 49. Khakh BS, Proctor WR, Dunwiddie TV, Labarca C, Lester HA. Allosteric control of gating  
649 and kinetics at P2X(4) receptor channels. *J Neurosci*. 1999;19(17):7289-99. Epub  
650 1999/08/25. PubMed PMID: 10460235; PMCID: PMC6782529.
- 651 50. Gonzalez Canga A, Sahagun Prieto AM, Diez Liebana MJ, Fernandez Martinez N, Sierra  
652 Vega M, Garcia Vieitez JJ. The pharmacokinetics and interactions of ivermectin in humans-  
653 -a mini-review. *AAPS J*. 2008;10(1):42-6. Epub 2008/05/01. doi: 10.1208/s12248-007-  
654 9000-9. PubMed PMID: 18446504; PMCID: PMC2751445.
- 655 51. Estrada-Mondragon A, Lynch JW. Functional characterization of ivermectin binding sites in  
656 alpha1beta2gamma2L GABA(A) receptors. *Front Mol Neurosci*. 2015;8:55. Epub  
657 2015/10/07. doi: 10.3389/fnmol.2015.00055. PubMed PMID: 26441518; PMCID:  
658 PMC4585179.
- 659 52. Weng JY, Hsu TT, Sun SH. Functional characterization of P2Y1 versus P2X receptors in  
660 RBA-2 astrocytes: elucidate the roles of ATP release and protein kinase C. *J Cell Biochem*.  
661 2008;104(2):554-67. Epub 2007/12/12. doi: 10.1002/jcb.21645. PubMed PMID: 18072286.
- 662 53. Priel A, Silberberg SD. Mechanism of ivermectin facilitation of human P2X4 receptor  
663 channels. *J Gen Physiol*. 2004;123(3):281-93. Epub 2004/02/11. doi:  
664 10.1085/jgp.200308986. PubMed PMID: 14769846; PMCID: PMC2217454.
- 665 54. Leon C, Freund M, Latchoumanin O, Farret A, Petit P, Cazenave JP, Gachet C. The P2Y(1)  
666 receptor is involved in the maintenance of glucose homeostasis and in insulin secretion in  
667 mice. *Purinergic Signal*. 2005;1(2):145-51. Epub 2008/04/12. doi: 10.1007/s11302-005-  
668 6209-x. PubMed PMID: 18404499; PMCID: PMC2096536.
- 669 55. Khan S, Yan-Do R, Duong E, Wu X, Bautista A, Cheley S, MacDonald PE, Braun M.  
670 Autocrine activation of P2Y1 receptors couples Ca (2+) influx to Ca (2+) release in human  
671 pancreatic beta cells. *Diabetologia*. 2014;57(12):2535-45. Epub 2014/09/12. doi:  
672 10.1007/s00125-014-3368-8. PubMed PMID: 25208758.
- 673 56. Balasubramanian R, Ruiz de Azua I, Wess J, Jacobson KA. Activation of distinct P2Y  
674 receptor subtypes stimulates insulin secretion in MIN6 mouse pancreatic beta cells. *Biochem*  
675 *Pharmacol*. 2010;79(9):1317-26. Epub 2010/01/14. doi: 10.1016/j.bcp.2009.12.026.  
676 PubMed PMID: 20067775; PMCID: PMC2864154.
- 677 57. Love MI, Huber W, Anders S. Moderated estimation of fold change and dispersion for RNA-  
678 seq data with DESeq2. *Genome biology*. 2014;15(12):550. doi: 10.1186/s13059-014-0550-  
679 8. PubMed PMID: 25516281; PMCID: 4302049.
- 680 58. Murphy TH, Worley PF, Nakabeppu Y, Christy B, Gastel J, Baraban JM. Synaptic regulation  
681 of immediate early gene expression in primary cultures of cortical neurons. *J Neurochem*.  
682 1991;57(6):1862-72. Epub 1991/12/01. doi: 10.1111/j.1471-4159.1991.tb06396.x. PubMed  
683 PMID: 1719131.
- 684 59. Gerst F, Jaghutriz BA, Staiger H, Schulte AM, Lorza-Gil E, Kaiser G, Panse M, Haug S,  
685 Heni M, Schutz M, Stadion M, Schurmann A, Marzetta F, Ibberson M, Sipos B, Fend F,  
686 Fleming T, Nawroth PP, Konigsrainer A, Nadalin S, Wagner S, Peter A, Fritsche A, Richter  
687 D, Solimena M, Haring HU, Ullrich S, Wagner R. The Expression of Aldolase B in Islets Is  
688 Negatively Associated With Insulin Secretion in Humans. *J Clin Endocrinol Metab*.

- 689 2018;103(12):4373-83. Epub 2018/09/12. doi: 10.1210/jc.2018-00791. PubMed PMID:  
690 30202879; PMCID: PMC6915830.
- 691 60. Gasecka A, Rogula S, Eyileten C, Postula M, Jaguszewski MJ, Kochman J, Mazurek T,  
692 Nieuwland R, Filipiak KJ. Role of P2Y Receptors in Platelet Extracellular Vesicle Release.  
693 *Int J Mol Sci.* 2020;21(17). Epub 2020/08/28. doi: 10.3390/ijms21176065. PubMed PMID:  
694 32842470; PMCID: PMC7504123.
- 695 61. Lommen J, Stahr A, Ingenwerth M, Ali AAH, von Gall C. Time-of-day-dependent  
696 expression of purinergic receptors in mouse suprachiasmatic nucleus. *Cell Tissue Res.*  
697 2017;369(3):579-90. Epub 2017/05/27. doi: 10.1007/s00441-017-2634-8. PubMed PMID:  
698 28547658; PMCID: PMC5579179.
- 699 62. Svobodova I, Bhattaracharya A, Ivetic M, Bendova Z, Zemkova H. Circadian ATP Release  
700 in Organotypic Cultures of the Rat Suprachiasmatic Nucleus Is Dependent on P2X7 and P2Y  
701 Receptors. *Front Pharmacol.* 2018;9:192. Epub 2018/03/22. doi: 10.3389/fphar.2018.00192.  
702 PubMed PMID: 29559915; PMCID: PMC5845546.
- 703 63. Woehrle T, Ledderose C, Rink J, Slubowski C, Junger WG. Autocrine stimulation of P2Y1  
704 receptors is part of the purinergic signaling mechanism that regulates T cell activation.  
705 *Purinergic Signal.* 2019;15(2):127-37. Epub 2019/03/29. doi: 10.1007/s11302-019-09653-6.  
706 PubMed PMID: 30919205; PMCID: PMC6635541.
- 707 64. Gil-Lozano M, Mingomataj EL, Wu WK, Ridout SA, Brubaker PL. Circadian secretion of  
708 the intestinal hormone GLP-1 by the rodent L cell. *Diabetes.* 2014;63(11):3674-85. Epub  
709 2014/05/03. doi: 10.2337/db13-1501. PubMed PMID: 24789917.
- 710 65. Linn DK, Zimmerman TJ, Nardin GF, Yung R, Berberich S, DuBiner H, Fuqua M. Effect of  
711 intracameral carbachol on intraocular pressure after cataract extraction. *Am J Ophthalmol.*  
712 1989;107(2):133-6. Epub 1989/02/15. doi: 10.1016/0002-9394(89)90211-0. PubMed PMID:  
713 2913806.
- 714 66. Crismon ML. Tacrine: first drug approved for Alzheimer's disease. *Ann Pharmacother.*  
715 1994;28(6):744-51. Epub 1994/06/01. doi: 10.1177/106002809402800612. PubMed PMID:  
716 7919566.
- 717 67. Zhang R, Lahens NF, Ballance HI, Hughes ME, Hogenesch JB. A circadian gene expression  
718 atlas in mammals: implications for biology and medicine. *Proc Natl Acad Sci U S A.*  
719 2014;111(45):16219-24. doi: 10.1073/pnas.1408886111. PubMed PMID: 25349387;  
720 PMCID: 4234565.
- 721 68. Levine DC, Hong H, Weidemann BJ, Ramsey KM, Affinati AH, Schmidt MS, Cedernaes J,  
722 Omura C, Braun R, Lee C, Brenner C, Peek CB, Bass J. NAD(+) Controls Circadian  
723 Reprogramming through PER2 Nuclear Translocation to Counter Aging. *Mol Cell.*  
724 2020;78(5):835-49 e7. Epub 2020/05/06. doi: 10.1016/j.molcel.2020.04.010. PubMed  
725 PMID: 32369735; PMCID: PMC7275919.
- 726 69. Sato S, Solanas G, Peixoto FO, Bee L, Symeonidi A, Schmidt MS, Brenner C, Masri S,  
727 Benitah SA, Sassone-Corsi P. Circadian Reprogramming in the Liver Identifies Metabolic  
728 Pathways of Aging. *Cell.* 2017;170(4):664-77 e11. Epub 2017/08/13. doi:  
729 10.1016/j.cell.2017.07.042. PubMed PMID: 28802039; PMCID: PMC7792549.
- 730 70. Sutton EF, Beyl R, Early KS, Cefalu WT, Ravussin E, Peterson CM. Early Time-Restricted  
731 Feeding Improves Insulin Sensitivity, Blood Pressure, and Oxidative Stress Even without  
732 Weight Loss in Men with Prediabetes. *Cell Metab.* 2018;27(6):1212-21 e3. Epub  
733 2018/05/15. doi: 10.1016/j.cmet.2018.04.010. PubMed PMID: 29754952; PMCID:  
734 PMC5990470.



- 735 71. Lamia KA, Storch KF, Weitz CJ. Physiological significance of a peripheral tissue circadian  
736 clock. *Proc Natl Acad Sci U S A*. 2008;105(39):15172-7. Epub 2008/09/10. doi: 0806717105  
737 [pii]10.1073/pnas.0806717105. PubMed PMID: 18779586.
- 738 72. Petrenko V, Gandasi NR, Sage D, Tengholm A, Barg S, Dibner C. In pancreatic islets from  
739 type 2 diabetes patients, the dampened circadian oscillators lead to reduced insulin and  
740 glucagon exocytosis. *Proc Natl Acad Sci U S A*. 2020;117(5):2484-95. Epub 2020/01/23.  
741 doi: 10.1073/pnas.1916539117. PubMed PMID: 31964806; PMCID: PMC7007532.
- 742 73. Petrenko V, Stolovich-Rain M, Vandereycken B, Giovannoni L, Storch KF, Dor Y, Chera S,  
743 Dibner C. The core clock transcription factor BMAL1 drives circadian beta-cell proliferation  
744 during compensatory regeneration of the endocrine pancreas. *Genes Dev*. 2020;34(23-  
745 24):1650-65. Epub 2020/11/14. doi: 10.1101/gad.343137.120. PubMed PMID: 33184223;  
746 PMCID: PMC7706703.
- 747 74. Alvarez-Dominguez JR, Donaghey J, Rasouli N, Kenty JHR, Helman A, Charlton J,  
748 Straubhaar JR, Meissner A, Melton DA. Circadian Entrainment Triggers Maturation of  
749 Human In Vitro Islets. *Cell Stem Cell*. 2020;26(1):108-22 e10. Epub 2019/12/17. doi:  
750 10.1016/j.stem.2019.11.011. PubMed PMID: 31839570.
- 751 75. Peek CB, Affinati AH, Ramsey KM, Kuo HY, Yu W, Sena LA, Ilkayeva O, Marcheva B,  
752 Kobayashi Y, Omura C, Levine DC, Bacsik DJ, Gius D, Newgard CB, Goetzman E, Chandel  
753 NS, Denu JM, Mrksich M, Bass J. Circadian clock NAD<sup>+</sup> cycle drives mitochondrial  
754 oxidative metabolism in mice. *Science*. 2013;342(6158):1243417. doi:  
755 10.1126/science.1243417. PubMed PMID: 24051248; PMCID: 3963134.
- 756 76. Burns SM, Vetere A, Walpita D, Dancik V, Khodier C, Perez J, Clemons PA, Wagner BK,  
757 Altshuler D. High-throughput luminescent reporter of insulin secretion for discovering  
758 regulators of pancreatic Beta-cell function. *Cell Metab*. 2015;21(1):126-37. Epub  
759 2015/01/08. doi: 10.1016/j.cmet.2014.12.010. PubMed PMID: 25565210.
- 760 77. Isolation of Human Pancreatic Islets of Langerhans for Research V.3 [Internet]2021 [cited  
761 Oct 22, 2021]. Available from: [https://www.protocols.io/view/isolation-of-human-  
762 pancreatic-islets-of-langerhans-bt55nq86](https://www.protocols.io/view/isolation-of-human-pancreatic-islets-of-langerhans-bt55nq86).
- 763 78. Hughes ME, Hogenesch JB, Kornacker K. JTK\_CYCLE: an efficient nonparametric  
764 algorithm for detecting rhythmic components in genome-scale data sets. *J Biol Rhythms*.  
765 2010;25(5):372-80. Epub 2010/09/30. doi: 25/5/372 [pii]10.1177/0748730410379711.  
766 PubMed PMID: 20876817.
- 767

# Figure 1

## A Experimental design

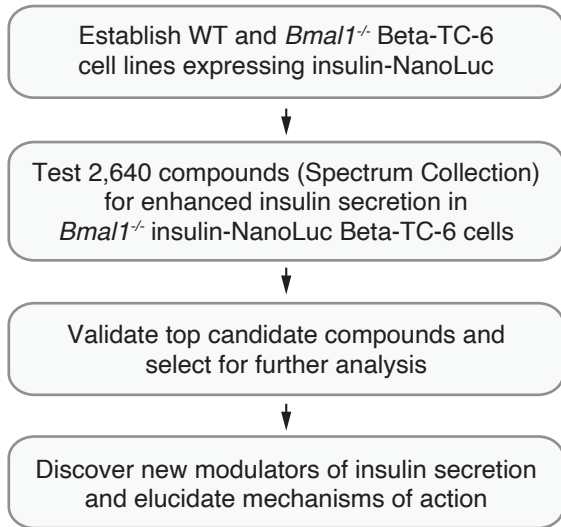

## B Insulin-NanoLuc Beta-TC-6 cell lines

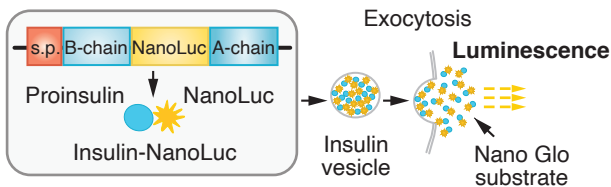

## C Correlation between insulin values and bioluminescence

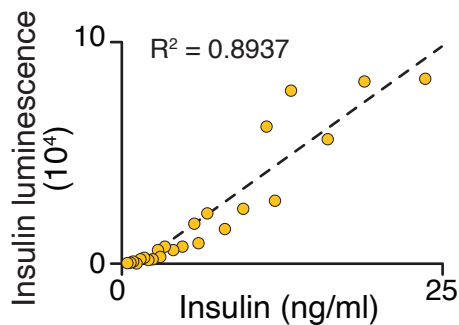

## D Validation of insulin secretion in insulin-NanoLuc cell lines

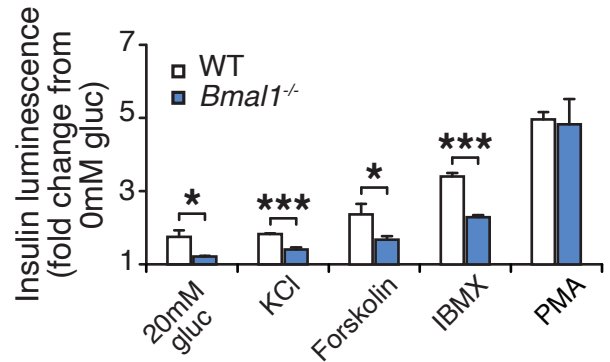

## E Drug screen design

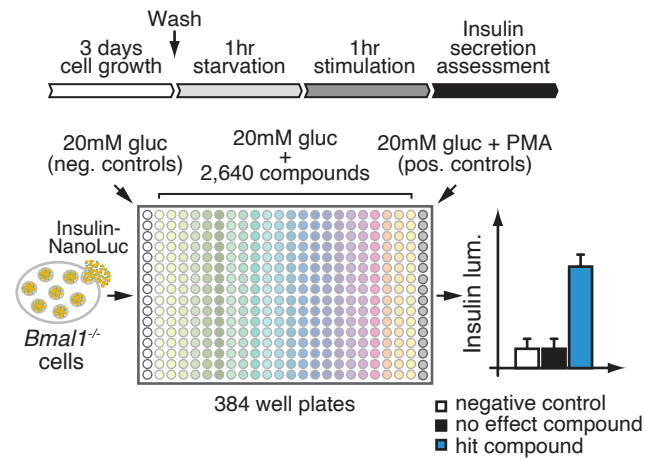

## F Drug screen feasibility

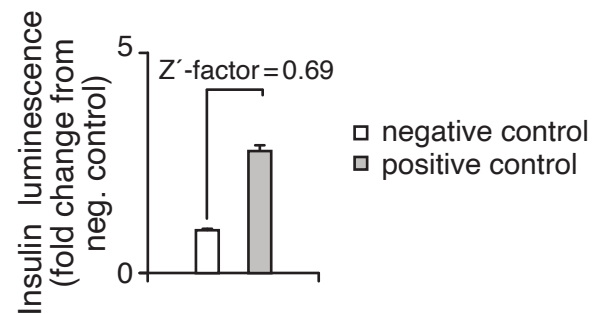

**Figure 1. High-throughput screen for chemical modulators of insulin secretion in circadian mutant  $\beta$  cells.** (A) Flow chart of “phenotype”-driven cell-based genetic screening platform to identify molecules and pathways that enhance insulin secretion during circadian  $\beta$ -cell failure. (B) Schematic of insulin-NanoLuciferase (NanoLuc) fusion construct, with bioluminescence as a proxy for insulin secretion. (C) Correlation between insulin-NanoLuc bioluminescence and insulin values measured by ELISA in response to a range of glucose concentrations (2-20 mM) ( $R^2=0.8937$ ). (D) Insulin-NanoLuc bioluminescence following 1-hr exposure to 20 mM glucose, 30 mM KCl, and 20 mM glucose plus 2.5  $\mu$ M forskolin, 500  $\mu$ M IBMX, or 10  $\mu$ M PMA in WT and *Bmal1*<sup>-/-</sup> insulin-NanoLuc Beta-TC-6 cells (n=3-10 repeats/condition). (E) Insulin-NanoLuc-expressing Beta-TC-6 *Bmal1*<sup>-/-</sup> cells were plated in nine 384 well plates prior to exposure to 10  $\mu$ M of each of the 2,640 compounds from the Spectrum collection in combination with 20 mM glucose. Negative (20 mM glucose alone) and positive (20 mM glucose plus 10  $\mu$ M PMA) controls were included on each plate. (F) Drug screen feasibility test comparing negative (20 mM glucose only) and positive (20 mM glucose plus PMA) controls (n=3 repeats) ( $Z'$ -factor = 0.69). All values represent mean  $\pm$  SEM. \*  $p<0.05$ , \*\*\*  $p<0.001$ .

**Figure 2**

**A Z-scores for screened compounds**

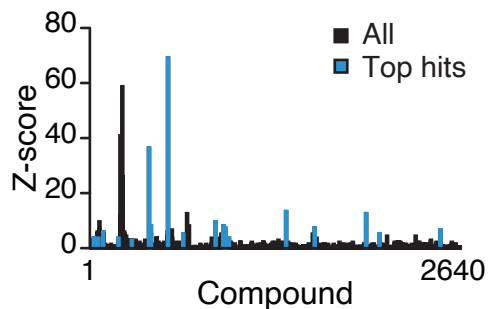

**B Hit compounds**

| #  | Compound                     | Fold change | Z-score | Targeted pathways                                                            | Function                                    |
|----|------------------------------|-------------|---------|------------------------------------------------------------------------------|---------------------------------------------|
| 1  | Tyrositrucin                 | 4.20        | 35.90   | AChE; $\beta$ -galactosidase; phospholipid membrane                          | Topical antibacterial and antifungal        |
| 2  | Suloctidil                   | 3.89        | 68.74   | $Ca^{2+}$ channel; sphingomyelin phosphodiesterase                           | Peripheral vasodilator; antifungal          |
| 3  | Alexidine hydrochloride      | 2.88        | 13.50   | PTPMT1; lipopolysaccharides                                                  | Antibacterial; mouthwash                    |
| 4  | Tomatine                     | 2.23        | 12.14   | AChE; sterols; PI3K-Akt pathway; MAPK pathway                                | Antifungal; antibacterial; antiinflammatory |
| 5  | Benzalkonium chloride        | 1.47        | 9.19    | G protein signaling pathway                                                  | Topical antiinfective                       |
| 6  | Carbachol                    | 1.43        | 3.02    | M3R; AChE                                                                    | Cholinergic; mitotic                        |
| 7  | Isoetharine mesylate         | 1.34        | 7.96    | $\beta_2$ adrenergic receptor; PXR                                           | Bronchodilator                              |
| 8  | Ivermectin                   | 1.31        | 5.91    | GluCl; GlyR; GABA <sub>A</sub> R; nAChR; P2X; P2Y; GIRK; FXR                 | Anthelmintic; round worm infection          |
| 9  | Tacrine hydrochloride        | 1.31        | 7.20    | AChE; Na <sup>+</sup> and K <sup>+</sup> channels; Ca <sup>2+</sup> channels | Cholinesterase inhibitor; channel blocker   |
| 10 | Pipamperone                  | 1.26        | 6.12    | 5-HT <sub>2A</sub> receptor; dopamine D4 receptors                           | Sedative; antipsychotic                     |
| 11 | Dyclonine hydrochloride      | 1.26        | 3.79    | Na <sup>+</sup> channel; ALDH; HKMT                                          | Topical anaesthetic                         |
| 12 | Desoxycorticosterone acetate | 1.26        | 3.68    | Mineralocorticoid receptor                                                   | Mineralocorticoid                           |

**C Hit compound signaling pathways affecting insulin secretion**

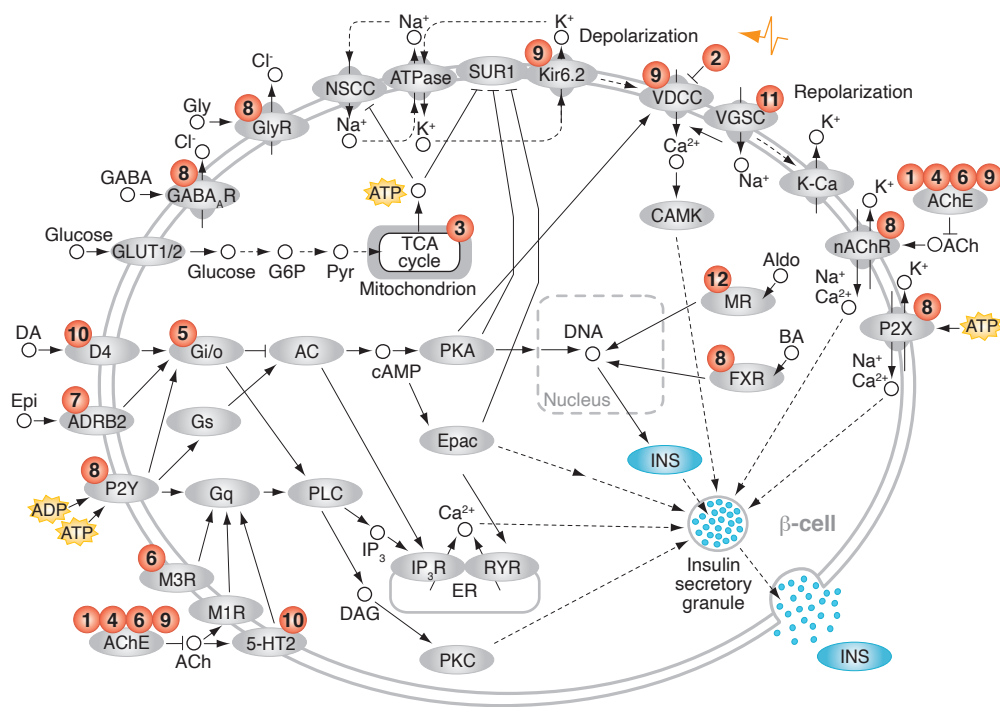

\* Numbers correspond to hit compounds in Figure 2B.

**D Lead compound verification in WT islets**

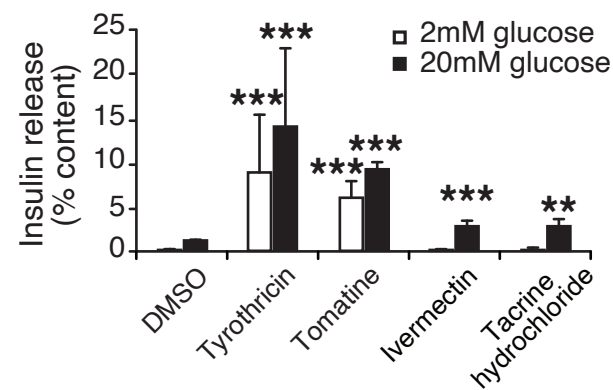

**E Ivermectin dose response curve**

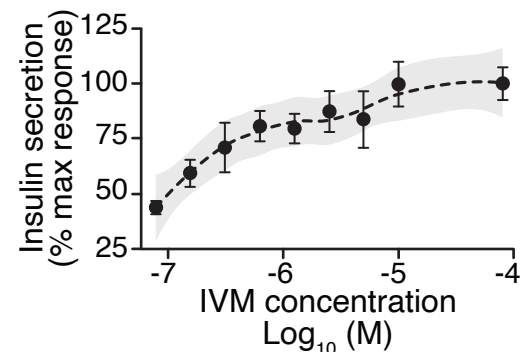

**Figure 2. Identification and validation of high-throughput screen lead compounds in murine islets at high and low glucose concentrations. (A)** Z-scores for all 2,640 screened compounds, with hit compounds indicated in blue. **(B)** Top 12 hit compounds identified from screen with a fold increase >1.25 and a Z-score >3 which were selected for further analysis. Known functions and published molecular pathways targeted by these compounds are indicated. **(C)** Model of potential mechanisms of action of the top 12 hit compounds to affect insulin secretion in the  $\beta$  cell. **(D)** Glucose-responsive insulin secretion by ELISA at 2 mM and 20 mM glucose in WT mouse islets following exposure to 4 lead candidate compounds (n=3-11 mice/compound). **(E)** IVM dose response curve (n=6-8 repeats/dose), ranging from 0.078  $\mu$ M to 80  $\mu$ M IVM, in insulin-NanoLuc expressing Beta-TC-6 cells. Shaded area represents 95% confidence intervals for the LOESS curve. All values represent mean  $\pm$  SEM. \*\* p<0.01, \*\*\* p<0.001.

### A Acute and overnight IVM treatments increase insulin secretion in WT islets

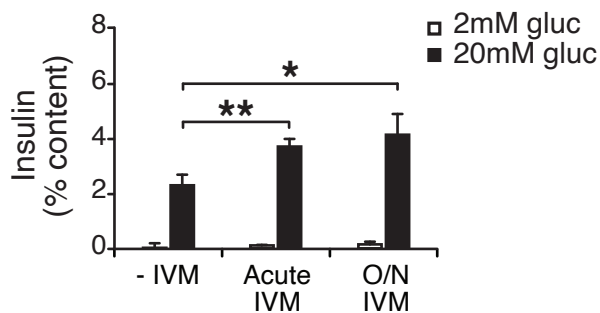

### D IVM rescues insulin secretion defect in *Bmal1* mutant islets

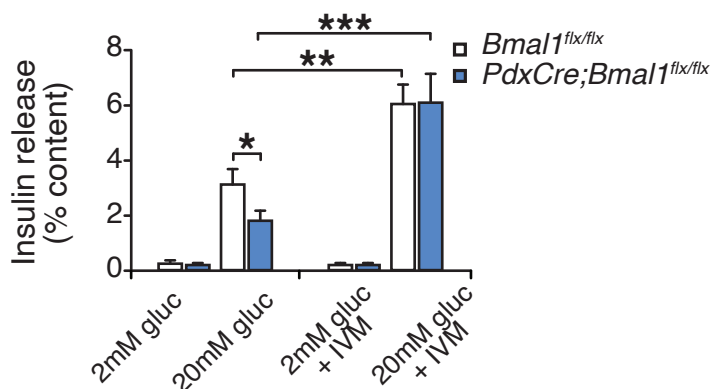

### B IVM enhances glucose-dependent $Ca^{2+}$ influx

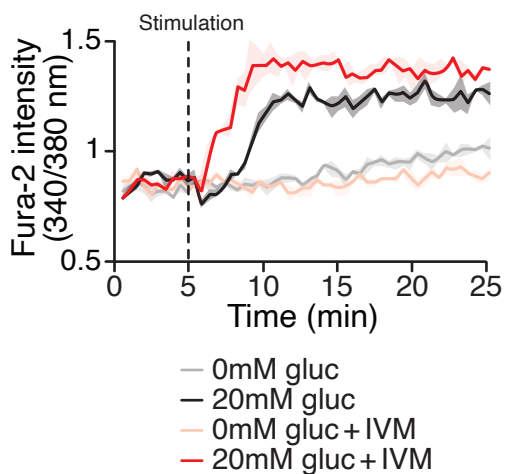

### E IVM restores insulin exocytosis in *Bmal1* mutant islet $\beta$ cells

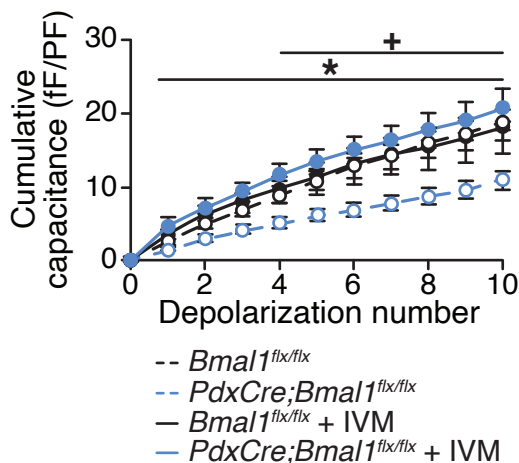

### C IVM augments insulin release during perfusion

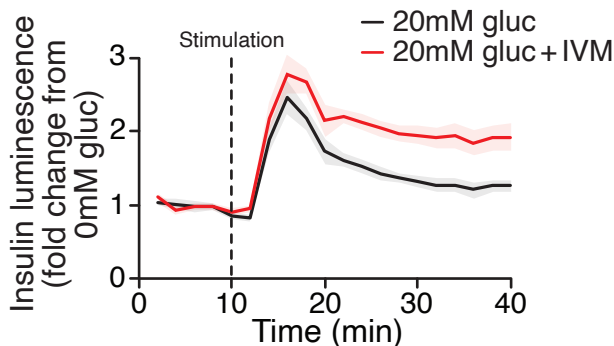

### F IVM increases insulin exocytosis in human islet $\beta$ cells

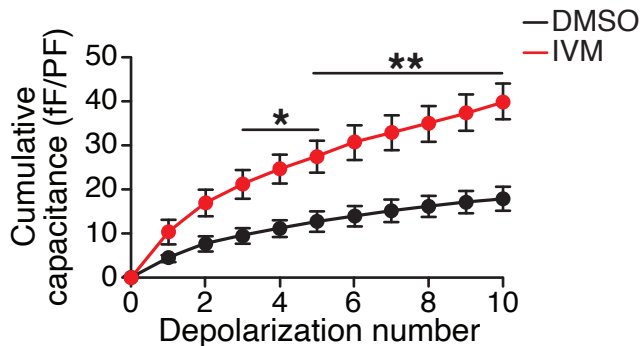

**Figure 3. Effect of lead compound ivermectin on glucose-stimulated insulin exocytosis and calcium flux from WT and *Bmal1* mutant  $\beta$  cells.** (A) Insulin secretion (expressed as % content) assessed by ELISA at 2 mM and 20 mM glucose in WT mouse islets in response to 1-hr 10  $\mu$ M IVM treatment or 24-hr 10  $\mu$ M IVM pre-treatment (n=5 mice). Data was analyzed by 2-way ANOVA and FDR correction for multiple testing. (B) Ratiometric determination of intracellular  $\text{Ca}^{2+}$  using Fura2-AM dye in WT Beta-TC-6 cells stimulated in the presence or absence of 10  $\mu$ M IVM (n=3 repeats/condition). (C) Perfusion analysis of insulin secretion in pseudoislets from WT insulin-NanoLuc cells in response to 10  $\mu$ M IVM in the presence of 20 mM glucose (n=6 repeats/condition). (D) Insulin secretion as assessed by ELISA from islets isolated from 8 mo old pancreas-specific *Bmal1* knockout (*Pdx-Cre;Bmal1<sup>flx/flx</sup>*) and *Bmal1<sup>flx/flx</sup>* mice in the presence or absence of 10  $\mu$ M IVM (n=10-11 mice/genotype). (E) Capacitance measurements in  $\beta$  cells from *PdxCre;Bmal1<sup>flx/flx</sup>* and *Bmal1<sup>flx/flx</sup>* mouse islets treated with 10  $\mu$ M IVM (n=4-5 mice/genotype, 5-16 cells per mouse). Asterisks denote significance between *PdxCre;Bmal1<sup>flx/flx</sup>* and *PdxCre;Bmal1<sup>flx/flx</sup>* + IVM; plus symbols denote significance between *Bmal1<sup>flx/flx</sup>* and *PdxCre;Bmal1<sup>flx/flx</sup>* for all depolarization numbers indicated. \*/+ p<0.05. (F) Capacitance measurements in  $\beta$  cells from human islets treated with 10  $\mu$ M IVM (n=3 donors, 7-11 cells per donor). Capacitance and calcium data were analyzed by 2-way repeated measures ANOVA with Bonferroni correction for multiple testing. All values represent mean  $\pm$  SEM. \* p<0.05, \*\* p<0.01, \*\*\* p<0.001.

## Figure 4

### A BMAL1 binding sites and decreased *P2ry1* expression in *Bmal1*<sup>-/-</sup> cells

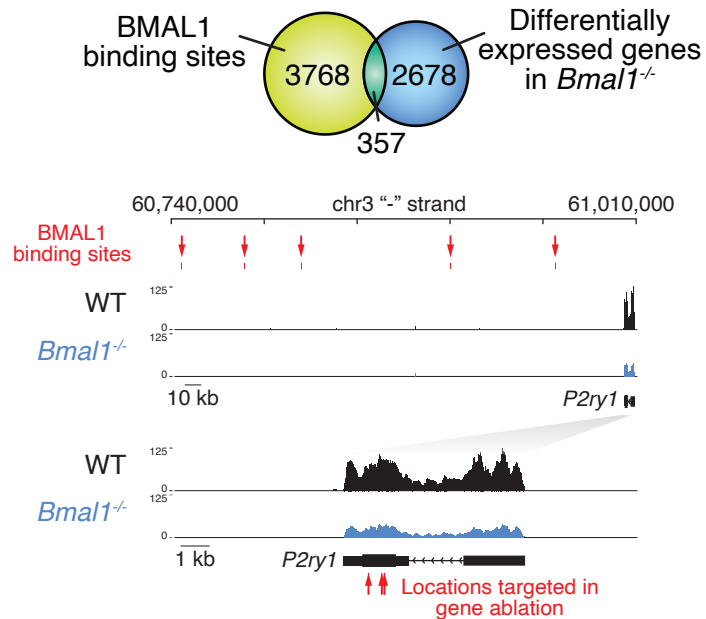

### B P2Y1 mediates IVM-induced insulin secretion

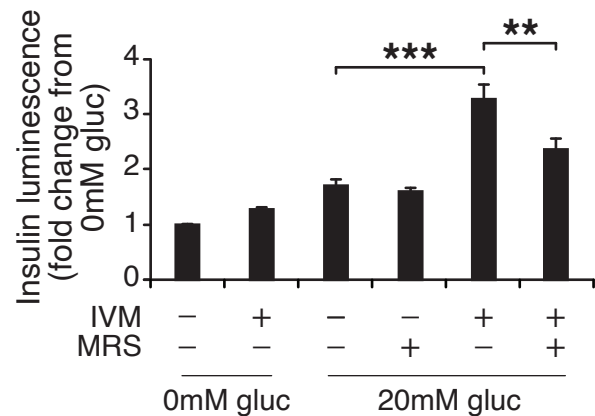

### C P2Y1 mediates IVM-induced Ca<sup>2+</sup> influx

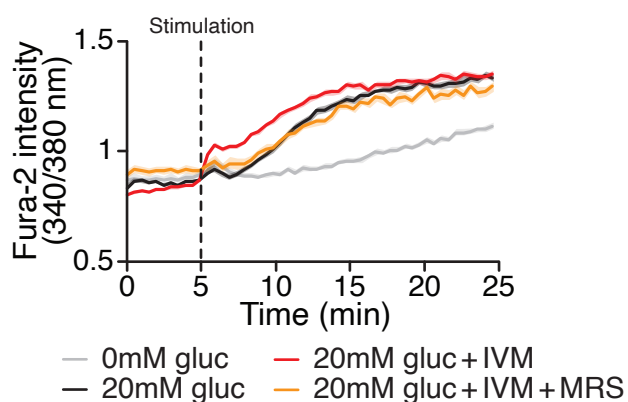

### D *P2ry1* ablation negates IVM-driven increase in insulin secretion

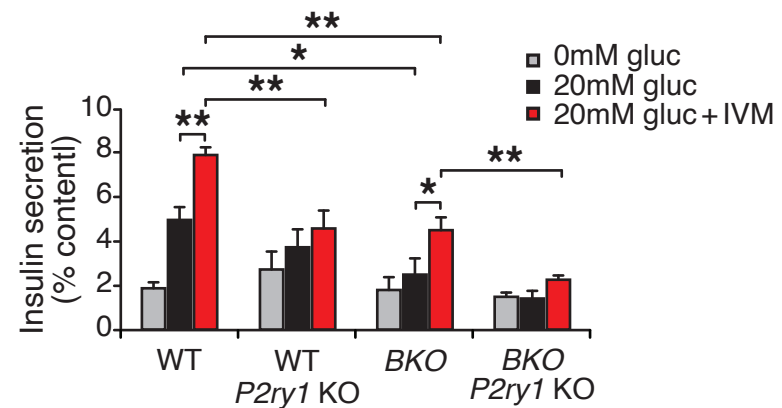

### E P2Y1 is required for IVM-mediated transcriptional signature

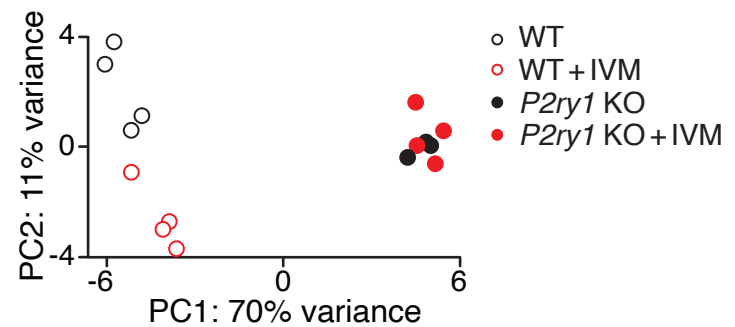

### F Ablation of *P2ry1* negates the effect of IVM on gene expression

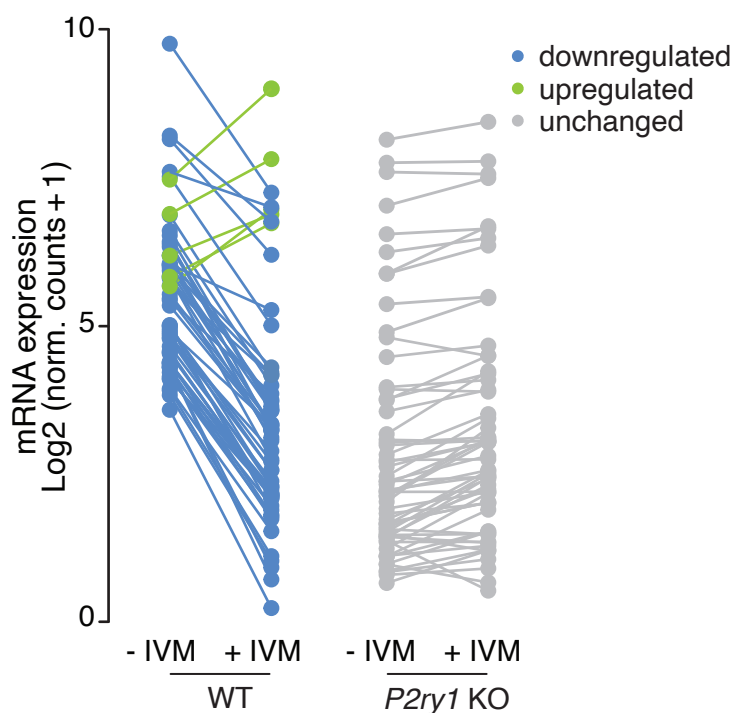



**Figure 4. Purinergic receptor P2Y1 is required for IVM to augment insulin exocytosis. (A)** Venn diagram of BMAL1 binding sites identified by ChIP-sequencing overlapping with differentially-expressed genes identified by RNA-sequencing in *Bmal1*<sup>-/-</sup> β-cell line compared to control cell line (*top*). Browser tracks showing decreased expression of *P2ry1* gene in *Bmal1*<sup>-/-</sup> cells compared to controls. BMAL1 binding sites upstream of the *P2ry1* gene are also indicated (*bottom*). **(B)** Bioluminescence from WT insulin-NanoLuc pseudoislets in response to 10 μM IVM and/or 10 μM of the P2Y1 antagonist MRS2179 (n=4-8 experiments, 3-8 repeats per experiment). **(C)** Ratiometric determination of intracellular Ca<sup>2+</sup> using Fura2-AM dye in WT Beta-TC-6 cells stimulated in the presence or absence of 10μM IVM (n=3-8 experiments, 4-12 repeats per experiment). **(D)** Insulin secretion by ELISA in pseudoislets from *P2ry1* KO and control WT and *Bmal1*<sup>-/-</sup> Beta-TC-6 cells (n=4/genotype/condition). Benjamini and Hochberg FDR-adjusted P values were computed for multiple comparisons following two-way ANOVA. **(E)** First two principal components (PC1 and PC2) following unbiased principal component analysis (PCA) of DESeq2 normalized counts in WT, WT + IVM, *P2yr1* KO, and *P2yr1* KO cells (n=4 per group). **(F)** Mean log<sub>2</sub>-transformed DESeq2-normalized counts in WT, WT + IVM, *P2yr1* KO, and *P2yr1* KO cells (n=4 per group) at differentially-expressed (1.5 fold, adjusted P value < 0.05) transcripts identified between WT and WT + IVM treated cells). All values represent mean ± SEM. \* p<0.05, \*\* p<0.01, \*\*\* p<0.001.

## A Exclusion flow chart

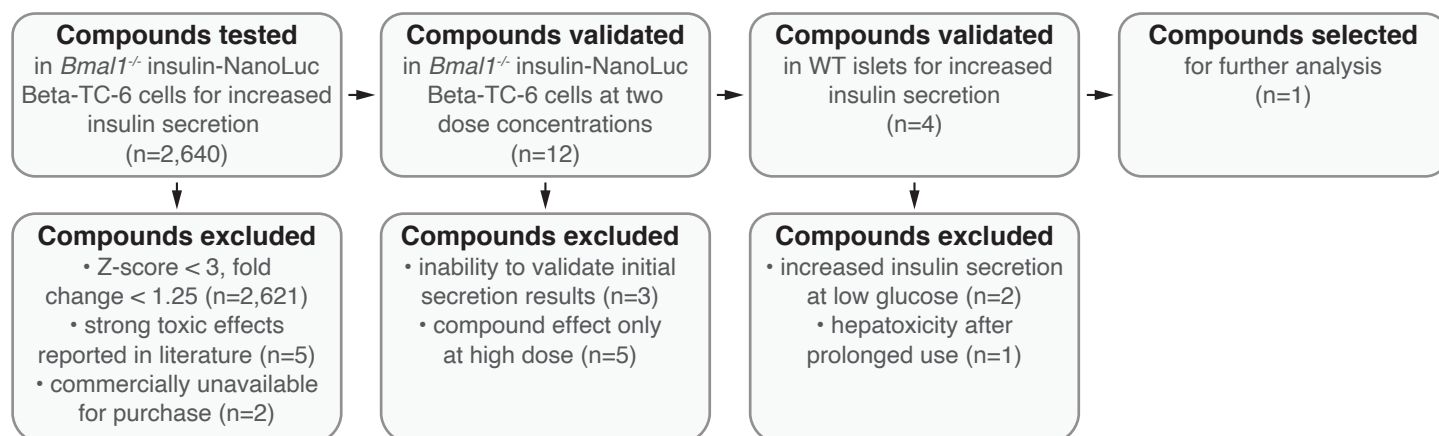

## B Hit compound validation in *Bmal1*<sup>-/-</sup> insulin-NanoLuc Beta-TC-6 cells

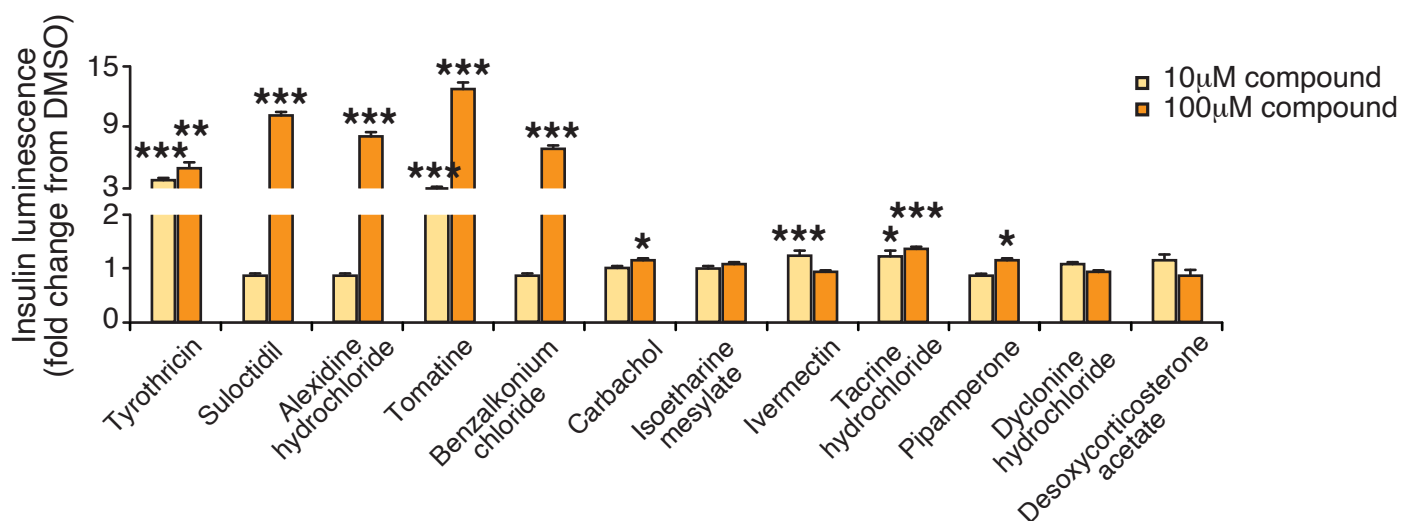

**Figure S1. High-throughput screen for modulators of insulin secretion in circadian mutant  $\beta$  cells and validation of lead compounds.** (A) Compound exclusion flow chart delineating exclusion criteria and numbers of compounds excluded at each validation step. (B) Hit compound validation at concentrations of 10 and 100  $\mu$ M in *Bmal1*<sup>-/-</sup> insulin-NanoLuc cells (n=3/compound). All values represent mean  $\pm$  SEM. \* p<0.05, \*\* p<0.01, \*\*\* p<0.001.

### A Acute and overnight IVM treatments increase insulin secretion in WT Beta-TC-6 cells

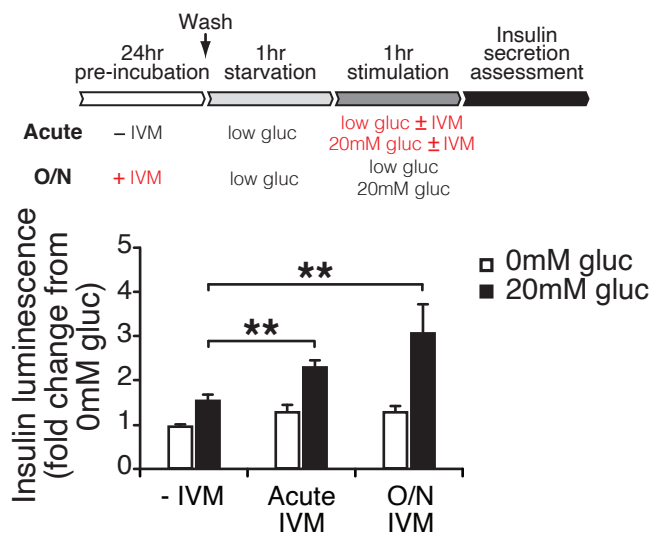

### B IVM ameliorates diabetic phenotype in *Akita* mice

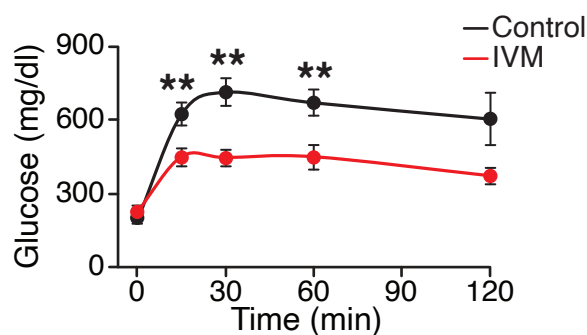

### C IVM improves insulin secretion in *Akita* islets

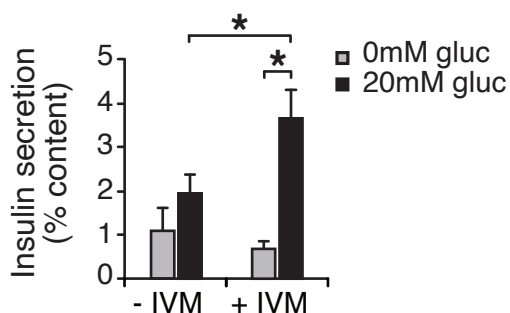

### D Calcium channel inhibition decreases IVM-driven increase in insulin secretion

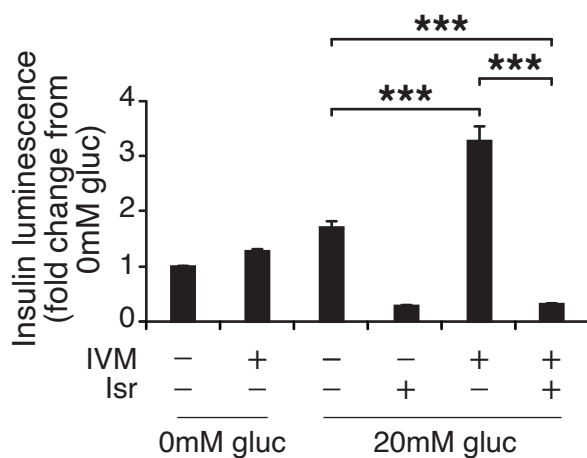

### E IVM effect on insulin secretion is Ca<sup>2+</sup>-dependent

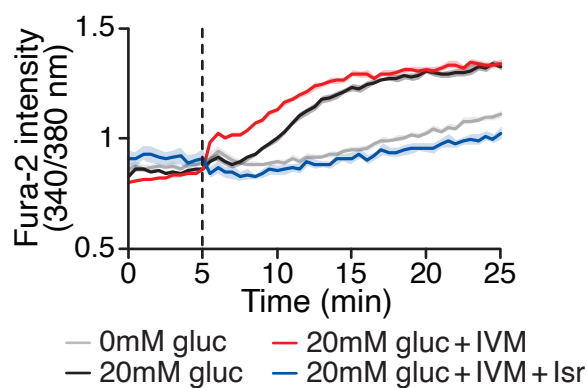

**Figure S2. Ivermectin improves insulin exocytosis in diabetic mice.** **(A)** Insulin-NanoLuc bioluminescence at 0 mM and 20 mM glucose in WT Beta-TC-6 cells in response to 1-hr 10  $\mu$ M IVM treatment or 24-hr 10  $\mu$ M IVM pre-treatment (n=5 experiments, 3-24 repeats/experiment). Data was analyzed by 2-way ANOVA and FDR correction for multiple testing. **(B)** Glucose levels at the indicated time points following an intraperitoneal injection of glucose (2 g/kg body weight) at ZT2 after 14 days of daily intraperitoneal injections with 1.3 mg/kg body weight of IVM (n=8 mice/genotype). Glucose levels were analyzed by 2-way repeated measures ANOVA with Bonferroni multiple testing. **(C)** Insulin secretion as assessed by ELISA from islets isolated from 4 mo old *Akita* mice in the presence or absence of 10  $\mu$ M IVM (n=5-6 mice/genotype). **(D)** Insulin secretion in pseudoislets from WT insulin-NanoLuc-expressing Beta-TC-6 cells in response to 10  $\mu$ M IVM and 5  $\mu$ M isradipine (ISR) (n=3-8 experiments, 3-8 repeats per experiment). **(E)** Ratiometric determination of intracellular  $Ca^{2+}$  using Fura2-AM dye in WT Beta-TC-6 cells stimulated with IVM or ISR (n=3-8 experiments, 6-8 repeats per experiment). All values represent mean  $\pm$  SEM. \*\* p<0.01, \*\*\* p<0.001.

# Figure S8

## A Robust BMAL1 control of *P2ry1* amongst pathways implicated in IVM signaling

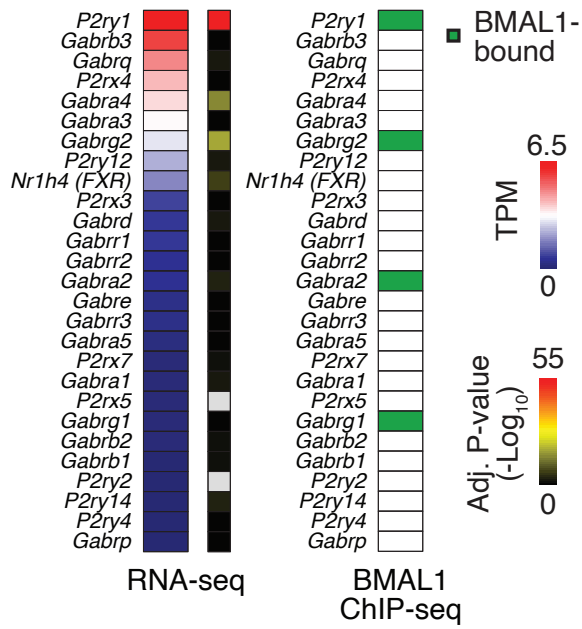

## B Rhythmic expression of *P2ry1* in WT Beta-TC-6 pseudoislets

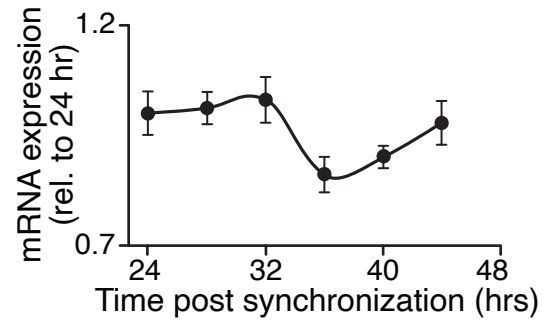

**Figure S3. Evidence for circadian control of *P2ry1*.** (A) mRNA abundance (TPM, transcripts per million) in WT  $\beta$  cells (left), DESeq2-adjusted P values from differential expression analysis in WT versus *Bmal1*<sup>-/-</sup>  $\beta$  cells (middle), and presence or absence of an annotated BMAL1 binding site near genes of putative IVM targets (right). (B) Rhythmic expression of *P2ry1* gene in synchronized pseudoislets from WT Beta-TC-6 cells as assessed by quantitative real-time PCR (n=3) (FDR adjusted P value < 0.05).

## Figure S4

### A Generation of *P2ry1* KO Beta-TC-6 cell line

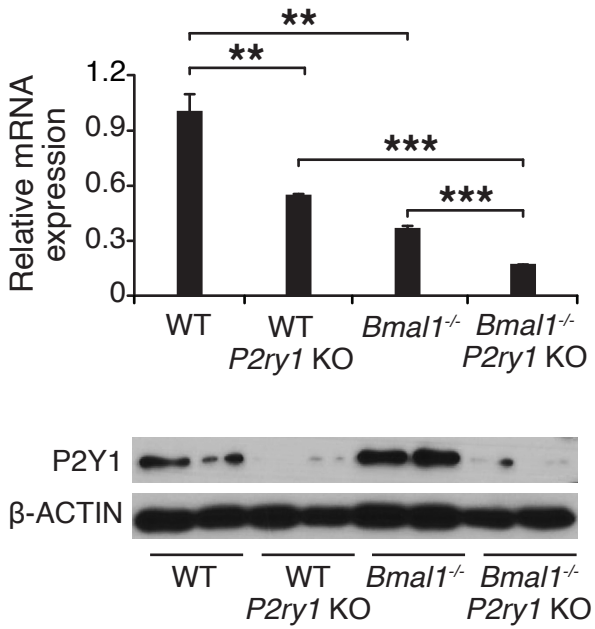

### B Ablation of *P2ry1* negates the effect of IVM on gene expression

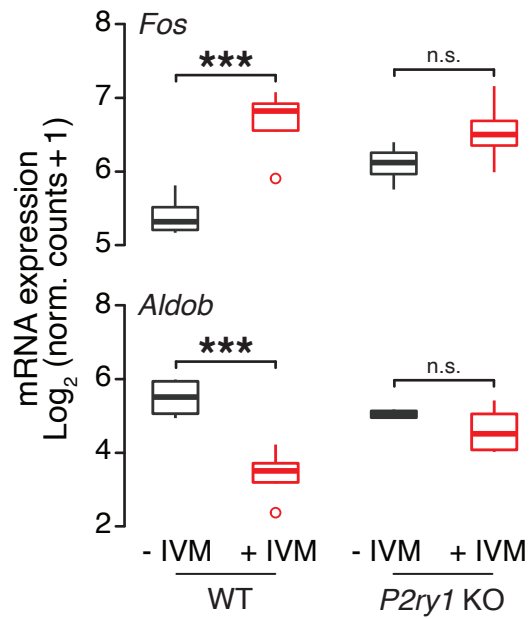



**Figure S4. Genetic ablation of purinergic receptor P2Y1 in Beta-TC-6 cells blunts effect of IVM on gene expression.** (A) Quantitative real-time PCR screening for disruption of *P2ry1* gene expression (n=3-4/genotype) (*top*). Decreased P2Y1 receptor protein expression by Western blot in WT and *Bmal1*<sup>-/-</sup> Beta-TC-6 cells after genetic disruption (*bottom*). (B) Loss of effect of IVM on gene expression in *P2ry1* mutant  $\beta$  cells identified by RNA-sequencing (n=4/genotype/condition). Dots represent values that exceed 1.5-fold of the interquartile range. All values represent mean  $\pm$  SEM. \* p<0.05, \*\* p<0.01, \*\*\* p<0.001.
